# Supplementary material for: Integration of fluxome and transcriptome data in Saccharomyces cerevisiae offers unique features of doxorubicin and imatinib
Source: Royal Society of Chemistry journal article supplement (doi:10.1039/d1mo00003a), 2021-06-29
Supplement: d1mo00003a1.xlsx [file d1mo00003a1.xlsx]

## Sheet: Supp Table Legends
	Supplementary Tables for "Cellular responses at different -omic levels offer unique features of drugs", by Hilal Taymaz-Nikerel
	Supplemenratry Table S1	GO-term and pathway enrcihment analysis for upregulated genes uniquely under doxorubicin stress
	Supplemenratry Table S2	GO-term and pathway enrcihment analysis for upregulated genes uniquely under imatinib stress
	Supplemenratry Table S3	GO-term and pathway enrcihment analysis for downregulated genes uniquely under doxorubicin stress
	Supplemenratry Table S4	GO-term and pathway enrcihment analysis for downregulated genes uniquely under imatinib stress
	Supplemenratry Table S5	GO-term and pathway enrcihment analysis for commonly downregulated genes under doxorubicin and imatinib stress
	Supplemenratry Table S7	GO-term and pathway enrcihment analysis for commonly upregulated genes under doxorubicin and imatinib stress
	Supplemenratry Table S6	GO-term and pathway enrcihment analysis for genes upregulated under doxorubicin and downregulated under imatinib stress
	Supplemenratry Table S8	GO-term and pathway enrcihment analysis for genes downregulated under doxorubicin and upregulated under imatinib stress

## Sheet: Supplementart_TableS1
Only Dox Up 826 (826 DAVID IDs)
Category	Term	Count	%	PValue	Genes	List Total	Pop Hits	Pop Total	Fold Enrichment	Bonferroni	Benjamini	FDR
GOTERM_BP_DIRECT	GO:0030435~sporulation resulting in formation of a cellular spore	34	4.11622	3.52074e-07	ADY4, SGA1, DIT2, SPO12, SHC1, SPO11, SPO77, RED1, SMK1, MEI4, IRC19, MUM3, RMD5, UBX6, SMA2, LOH1, GSM1, IME2, FMP45, SLZ1, RIM4, SPO74, SPR1, SSP2, SPO22, FKS3, SPO21, SPO20, CSM4, CDA2, DMC1, SPS2, OSW1, MPC54	661	112	5557	2.55211	0.000377352	0.000377423	0.000374607
GOTERM_BP_DIRECT	GO:0005975~carbohydrate metabolic process	30	3.63196	4.03655e-06	YMR085W, ATH1, SGA1, ATG26, MAL32, XYL2, GFA1, IMA4, YLR446W, IMA1, GAL10, IMA5, SPR1, CAT8, EXG2, GAL1, GAL3, NQM1, YNR071C, GUT1, CDA2, GAL80, GDB1, GPH1, HXK1, YHR210C, PKP1, GAS4, SIM1, FBP1	661	102	5557	2.47264	0.00431784	0.00216359	0.00214744
GOTERM_BP_DIRECT	GO:0006950~response to stress	17	2.05811	3.04404e-05	HSP82, YLR046C, PAU21, PAU1, PAU3, PUG1, FRT2, PAU18, PAU9, TIP1, PAU8, TIR2, RTA1, PAU5, PAU4, PAU7, DAN4	661	45	5557	3.17596	0.0321059	0.0108774	0.0107962
GOTERM_BP_DIRECT	GO:0055085~transmembrane transport	48	5.81114	0.000291621	FCY21, MAL11, FLR1, FCY22, SFC1, YKE4, MME1, YFL040W, ESBP6, AMF1, ARN2, ARR3, YIA6, HXT2, MAL31, HOL1, YBT1, HXT7, ALP1, HXT4, HXT5, STE6, ALR2, ECM27, YKR104W, TRK2, TRK1, YNL095C, THI7, PCA1, YJL163C, MCH5, VHC1, MPH2, TPC1, SNF3, AAC1, YFL054C, NFT1, GUP2, YOL075C, HXT17, FLC2, AQY2, PXA2, JEN1, YFR045W, VMR1	661	240	5557	1.68139	0.268504	0.0781544	0.0775711
GOTERM_BP_DIRECT	GO:0051321~meiotic cell cycle	28	3.38983	0.00037457	ADY4, MEC1, SPO12, SPO11, RED1, MEI4, ECM8, HOP1, RMD5, IME2, MER1, RDH54, SLZ1, RIM4, REC104, SPO22, RMI1, SPO21, AME1, CSM4, REC8, RAD50, DMC1, SPS2, ZIP2, MPC54, NDT80, RIM15	661	116	5557	2.02927	0.330761	0.0803078	0.0797085
GOTERM_BP_DIRECT	GO:0007131~reciprocal meiotic recombination	17	2.05811	0.00055759	MEC1, ECM11, SPO11, RED1, MLH3, REC8, MSC1, RAD50, MER1, RAD24, RDH54, DMC1, RIM4, PSY3, TOP3, ZIP2, REC104	661	56	5557	2.55211	0.450036	0.0996227	0.0988792
GOTERM_BP_DIRECT	GO:0000754~adaptation of signaling pathway by response to pheromone involved in conjugation with cellular fusion	8	0.968523	0.000879445	BAR1, MSG5, SDP1, GPA1, SST2, ROD1, RRI2, ROG3	661	15	5557	4.48371	0.610612	0.128407	0.127449
GOTERM_BP_DIRECT	GO:0015891~siderophore transport	6	0.726392	0.000958261	FIT2, FIT3, ARN1, FRE4, FRE3, ARN2	661	8	5557	6.30522	0.642188	0.128407	0.127449
GOTERM_BP_DIRECT	GO:0030476~ascospore wall assembly	15	1.81598	0.00151477	DIT2, SSP2, SPO77, FKS3, SMK1, SWF1, MUM3, CDA2, SMA2, LOH1, TEP1, GAS4, SPS2, CHS3, OSW1	661	50	5557	2.52209	0.8031	0.180425	0.179079
GOTERM_BP_DIRECT	GO:0031505~fungal-type cell wall organization	30	3.63196	0.00171582	WSC2, SPI1, SKG1, PAU21, IRS4, PAU1, PAU3, CSR2, PAU9, PAU8, PAU5, FMP45, PAU4, PAU7, IRE1, SPR1, EXG2, NCA3, ZRG8, AVO2, PAU18, TIP1, TIR2, YPS7, MSB2, YPS6, SIM1, DAN4, YPS3, PIR3	661	140	5557	1.80149	0.841332	0.183936	0.182564
GOTERM_BP_DIRECT	GO:0019236~response to pheromone	11	1.33172	0.00224247	BAR1, STE18, STE6, STE4, PRR2, STE5, GPA1, SST2, AGA1, STE2, FIG2	661	31	5557	2.98311	0.909881	0.201241	0.199739
GOTERM_BP_DIRECT	GO:0000023~maltose metabolic process	7	0.847458	0.0022527	MAL11, IMA4, IMA1, MPH2, IMA5, MAL32, MAL31	661	13	5557	4.52682	0.910866	0.201241	0.199739
GOTERM_BP_DIRECT	GO:0006081~cellular aldehyde metabolic process	6	0.726392	0.00351414	AAD3, AAD14, ALD2, AAD6, AAD4, YPL088W	661	10	5557	5.04418	0.977035	0.289782	0.287619
GOTERM_BP_DIRECT	GO:0034605~cellular response to heat	10	1.21065	0.00494311	HSP26, SSA4, UBC5, FLO1, HSP78, CUR1, RIM15, MRK1, DDR2, HSP30	661	29	5557	2.89895	0.995069	0.378501	0.375677
GOTERM_BP_DIRECT	GO:0046323~glucose import	10	1.21065	0.00633469	HXT7, HXT4, MAL11, HXT5, HXK1, HXT17, MPH2, YFL040W, HXT2, MAL31	661	30	5557	2.80232	0.9989	0.452719	0.44934
GOTERM_BP_DIRECT	GO:0015758~glucose transport	5	0.605327	0.00931377	HXT5, MTH1, RGT1, HXT2, SNF3	661	8	5557	5.25435	0.999956	0.624023	0.619366
GOTERM_BP_DIRECT	GO:0071555~cell wall organization	20	2.42131	0.013169	WSC2, WSC3, ECM11, SKG1, SHC1, FKS3, ECM5, SMK1, ECM7, ECM8, FIG2, TRS65, YPK2, GAS4, SPR1, CHS3, ECM34, SIM1, EXG2, PIR3	661	94	5557	1.78871	0.999999	0.731508	0.726049
GOTERM_BP_DIRECT	GO:1904659~glucose transmembrane transport	9	1.08959	0.0134868	HXT7, HXT4, MAL11, HXT5, HXT17, MPH2, YFL040W, HXT2, MAL31	661	28	5557	2.70224	1	0.731508	0.726049
GOTERM_BP_DIRECT	GO:0033499~galactose catabolic process via UDP-galactose	4	0.484262	0.0138657	GAL10, YHR210C, YNR071C, GAL1	661	5	5557	6.72557	1	0.731508	0.726049
GOTERM_BP_DIRECT	GO:0000746~conjugation	4	0.484262	0.0138657	SPH1, PRM1, HBT1, FIG2	661	5	5557	6.72557	1	0.731508	0.726049
GOTERM_BP_DIRECT	GO:0006006~glucose metabolic process	8	0.968523	0.0143299	FBP26, SAK1, RGT1, HXK1, DOG2, YHR210C, YNR071C, PKP1	661	23	5557	2.92416	1	0.731508	0.726049
GOTERM_BP_DIRECT	GO:0008152~metabolic process	47	5.69007	0.0160027	ATH1, SGA1, FOX2, ATG26, ALD3, GSY1, FDH1, ALD2, PLB3, YGR109W-B, MAL32, SNZ3, IMA4, IMA1, GAL10, IRE1, DCI1, IMA5, SPR1, ICL1, YDR018C, EXG2, GAL1, GAL3, FBP26, ICL2, MNL2, THI6, CRG1, PHM8, YDR261C-D, YJL113W, PNC1, YNR073C, GDB1, YHL012W, NTG1, HXK1, NTG2, DOG2, POT1, TKL2, RNR3, SIM1, FBP1, PCS60, POX1	661	284	5557	1.39129	1	0.77977	0.773951
GOTERM_BP_DIRECT	GO:0055072~iron ion homeostasis	9	1.08959	0.0167416	FIT2, FIT3, FRE2, ARN1, FRE4, FRE3, ARN2, FRE6, HMX1	661	29	5557	2.60906	1	0.780304	0.774481
GOTERM_BP_DIRECT	GO:0000750~pheromone-dependent signal transduction involved in conjugation with cellular fusion	8	0.968523	0.02278	STE18, KSS1, STE4, STE5, GPA1, STE2, AFR1, MFA1	661	25	5557	2.69023	1	1	0.993464
GOTERM_BP_DIRECT	GO:0034599~cellular response to oxidative stress	17	2.05811	0.0239639	YJR096W, XBP1, NQM1, GPX1, ECM5, LOT6, GAD1, GRX7, FRM2, MCR1, NTG1, GCY1, TSA2, TRR2, SRX1, MHR1, HSP31	661	80	5557	1.78648	1	1	0.993464
GOTERM_BP_DIRECT	GO:0046352~disaccharide catabolic process	4	0.484262	0.0253026	MAL11, IMA4, IMA1, IMA5	661	6	5557	5.60464	1	1	0.993464
GOTERM_BP_DIRECT	GO:0000165~MAPK cascade	5	0.605327	0.0328237	SLT2, KSS1, SMK1, RLM1, SMP1	661	11	5557	3.82135	1	1	0.993464
GOTERM_BP_DIRECT	GO:0042026~protein refolding	6	0.726392	0.0332555	HSP82, ECM10, SSA1, MDJ1, HSP78, SSE2	661	16	5557	3.15261	1	1	0.993464
GOTERM_BP_DIRECT	GO:0015761~mannose transport	6	0.726392	0.0332555	HXT7, HXT4, HXT5, HXT17, HXT2, SNF3	661	16	5557	3.15261	1	1	0.993464
GOTERM_BP_DIRECT	GO:0015755~fructose transport	6	0.726392	0.0332555	HXT7, HXT4, HXT5, HXT17, HXT2, SNF3	661	16	5557	3.15261	1	1	0.993464
GOTERM_BP_DIRECT	GO:0030437~ascospore formation	12	1.45278	0.0340625	RIM21, PAU8, FMP45, SSP2, SPO77, SHC1, SPO74, IRC19, SPR1, SPS2, OSW1, YOR338W	661	51	5557	1.97811	1	1	0.993464
GOTERM_BP_DIRECT	GO:0008643~carbohydrate transport	9	1.08959	0.0354396	HXT7, HXT4, MAL11, HXT5, HXT17, MPH2, HXT2, MAL31, SNF3	661	33	5557	2.29281	1	1	0.993464
GOTERM_BP_DIRECT	GO:0007126~meiotic nuclear division	10	1.21065	0.035605	RAD50, CIK1, RIM8, BNS1, SPO21, SLZ1, DMC1, RIM4, GAC1, NDT80	661	39	5557	2.15563	1	1	0.993464
GOTERM_BP_DIRECT	GO:0043328~protein targeting to vacuole involved in ubiquitin-dependent protein catabolic process via the multivesicular body sorting pathway	7	0.847458	0.0386177	COS6, COS4, COS2, SSH4, VPS25, TRE1, COS7	661	22	5557	2.67494	1	1	0.993464
GOTERM_BP_DIRECT	GO:0070681~glutaminyl-tRNAGln biosynthesis via transamidation	3	0.363196	0.0389245	PET112, GTF1, HER2	661	3	5557	8.40696	1	1	0.993464
GOTERM_BP_DIRECT	GO:0031684~heterotrimeric G-protein complex cycle	3	0.363196	0.0389245	STE18, STE4, GPA1	661	3	5557	8.40696	1	1	0.993464
GOTERM_BP_DIRECT	GO:0005980~glycogen catabolic process	3	0.363196	0.0389245	SGA1, GPH1, GDB1	661	3	5557	8.40696	1	1	0.993464
GOTERM_BP_DIRECT	GO:1901137~carbohydrate derivative biosynthetic process	3	0.363196	0.0389245	YMR084W, YMR085W, GFA1	661	3	5557	8.40696	1	1	0.993464
GOTERM_BP_DIRECT	GO:0016310~phosphorylation	35	4.23729	0.0398255	IKS1, MEC1, KNS1, KSS1, SMK1, PRR2, MRK1, KDX1, RCK1, SLT2, PFK26, THI20, SSK22, IME2, THI21, YLR446W, IRE1, DAK2, GAL1, KIN3, THI6, GUT1, KSP1, YHR033W, PSK1, SAK1, FRK1, YPL150W, HXK1, DBF2, KIN28, YPK2, PKP1, SKM1, RIM15	661	212	5557	1.38794	1	1	0.993464
GOTERM_BP_DIRECT	GO:0006000~fructose metabolic process	4	0.484262	0.0404275	PFK26, FBP26, HXK1, FBP1	661	7	5557	4.80398	1	1	0.993464
GOTERM_BP_DIRECT	GO:0007155~cell adhesion	4	0.484262	0.0404275	AGA1, AGA2, SAG1, FIG2	661	7	5557	4.80398	1	1	0.993464
GOTERM_BP_DIRECT	GO:0006468~protein phosphorylation	24	2.90557	0.0425362	KIN3, IKS1, KNS1, KSS1, SMK1, PRR2, KSP1, PSK1, MRK1, RCK1, SLT2, KDX1, SAK1, SSK22, IME2, FRK1, YPL150W, DBF2, KIN28, IRE1, YPK2, PKP1, SKM1, RIM15	661	134	5557	1.50572	1	1	0.993464
GOTERM_BP_DIRECT	GO:0035428~hexose transmembrane transport	5	0.605327	0.0447289	MAL11, MPH2, YFL040W, MAL31, SNF3	661	12	5557	3.5029	1	1	0.993464
GOTERM_BP_DIRECT	GO:0006457~protein folding	18	2.17918	0.0579886	HSP82, ECM10, PFD1, JAC1, BTN2, SSE2, CPR8, CUR1, TAH1, HSP26, FLC1, SSA3, FLC2, SSA4, CIN1, SSA1, TSA2, MDJ1	661	96	5557	1.5763	1	1	0.993464
GOTERM_BP_DIRECT	GO:0005978~glycogen biosynthetic process	5	0.605327	0.0587246	GSY1, PIG1, GAC1, GDB1, GLG1	661	13	5557	3.23345	1	1	0.993464
GOTERM_BP_DIRECT	GO:0034221~fungal-type cell wall chitin biosynthetic process	5	0.605327	0.0587246	YMR085W, CHS6, CHS3, GFA1, SKT5	661	13	5557	3.23345	1	1	0.993464
GOTERM_BP_DIRECT	GO:0071805~potassium ion transmembrane transport	5	0.605327	0.0587246	TRK2, TRK1, TOK1, VHC1, PRM6	661	13	5557	3.23345	1	1	0.993464
GOTERM_BP_DIRECT	GO:0015793~glycerol transport	4	0.484262	0.0590958	YFL054C, GUP2, AQY2, YLL053C	661	8	5557	4.20348	1	1	0.993464
GOTERM_BP_DIRECT	GO:0000706~meiotic DNA double-strand break processing	4	0.484262	0.0590958	RAD50, SGS1, SPO11, EXO1	661	8	5557	4.20348	1	1	0.993464
GOTERM_BP_DIRECT	GO:0009229~thiamine diphosphate biosynthetic process	4	0.484262	0.0590958	THI20, THI21, THI6, THI5	661	8	5557	4.20348	1	1	0.993464
GOTERM_BP_DIRECT	GO:0006012~galactose metabolic process	4	0.484262	0.0590958	GAL3, GAL10, GAL80, GAL1	661	8	5557	4.20348	1	1	0.993464
GOTERM_BP_DIRECT	GO:0000017~alpha-glucoside transport	3	0.363196	0.0717665	MAL11, MPH2, MAL31	661	4	5557	6.30522	1	1	0.993464
GOTERM_BP_DIRECT	GO:0000752~agglutination involved in conjugation with cellular fusion	3	0.363196	0.0717665	AGA1, AGA2, SAG1	661	4	5557	6.30522	1	1	0.993464
GOTERM_BP_DIRECT	GO:0015750~pentose transport	3	0.363196	0.0717665	HXT7, HXT4, HXT2	661	4	5557	6.30522	1	1	0.993464
GOTERM_BP_DIRECT	GO:0000501~flocculation via cell wall protein-carbohydrate interaction	3	0.363196	0.0717665	FLO9, FLO10, FLO1	661	4	5557	6.30522	1	1	0.993464
GOTERM_BP_DIRECT	GO:0000200~inactivation of MAPK activity involved in cell wall organization or biogenesis	3	0.363196	0.0717665	MSG5, PTP2, SDP1	661	4	5557	6.30522	1	1	0.993464
GOTERM_BP_DIRECT	GO:0006772~thiamine metabolic process	3	0.363196	0.0717665	THI20, THI22, THI21	661	4	5557	6.30522	1	1	0.993464
GOTERM_BP_DIRECT	GO:0071361~cellular response to ethanol	3	0.363196	0.0717665	ATH1, FLO1, HSP30	661	4	5557	6.30522	1	1	0.993464
GOTERM_BP_DIRECT	GO:0000132~establishment of mitotic spindle orientation	5	0.605327	0.0747662	KIP3, CIK1, DYN1, NIP100, LDB18	661	14	5557	3.00249	1	1	0.993464
GOTERM_BP_DIRECT	GO:0006635~fatty acid beta-oxidation	5	0.605327	0.0747662	FOX2, DCI1, POT1, PXA2, POX1	661	14	5557	3.00249	1	1	0.993464
GOTERM_BP_DIRECT	GO:0046835~carbohydrate phosphorylation	5	0.605327	0.0747662	GAL3, PFK26, HXK1, YLR446W, GAL1	661	14	5557	3.00249	1	1	0.993464
GOTERM_BP_DIRECT	GO:0009228~thiamine biosynthetic process	5	0.605327	0.0747662	THI20, THI22, THI21, THI6, THI5	661	14	5557	3.00249	1	1	0.993464
GOTERM_BP_DIRECT	GO:0006071~glycerol metabolic process	4	0.484262	0.0810398	GCY1, GUT1, DAK2, GUT2	661	9	5557	3.73643	1	1	0.993464
GOTERM_BP_DIRECT	GO:0055114~oxidation-reduction process	51	6.17433	0.0820956	DIT2, HEM14, LOT6, FDH1, YDR541C, AAD6, AAD4, XYL2, ARR2, AAD3, MCR1, CTT1, COR1, YKL107W, FRD1, IDP2, YKL070W, GPX1, GDH2, YNR073C, GRX7, GAL80, GND2, YJL045W, TRR2, POX1, YDL114W, HMX1, YCR102C, FOX2, YJR154W, ALD3, ALD2, ADH2, YPR127W, FMP46, OYE3, CTA1, SRX1, YJR096W, GUT2, YPL088W, FRM2, GCY1, AAD14, TSA2, FRE2, FRE4, FRE3, RNR3, FRE6	661	347	5557	1.2356	1	1	0.993464
GOTERM_BP_DIRECT	GO:0016311~dephosphorylation	12	1.45278	0.0844086	MSG5, FBP26, PTP2, TSL1, SDP1, TEP1, DOG2, PHM8, PPS1, FBP1, APP1, YMR087W	661	59	5557	1.70989	1	1	0.993464
GOTERM_BP_DIRECT	GO:0032120~ascospore-type prospore membrane assembly	5	0.605327	0.0927665	ATG26, SPO77, SPO21, MPC54, YSW1	661	15	5557	2.80232	1	1	0.993464
GOTERM_BP_DIRECT	GO:0007130~synaptonemal complex assembly	5	0.605327	0.0927665	RED1, DMC1, HOP1, ZIP2, REC8	661	15	5557	2.80232	1	1	0.993464
GOTERM_BP_DIRECT	GO:0030163~protein catabolic process	6	0.726392	0.0945924	BAR1, YPS7, YPS6, LAP2, SUE1, YPS3	661	21	5557	2.40199	1	1	0.993464
Category	Term	Count	%	PValue	Genes	List Total	Pop Hits	Pop Total	Fold Enrichment	Bonferroni	Benjamini	FDR
GOTERM_CC_DIRECT	GO:0000324~fungal-type vacuole	66	7.99031	1.11909e-07	WSC2, WSC3, FCY22, PLB3, ECM7, PAU1, ARN1, ARN2, YCR007C, HOL1, YBT1, YIR014W, RNY1, STE6, PAU5, PAU4, SPR1, IRC8, TDA6, PRM1, NCA3, YLR046C, AGA2, PUG1, GRX7, TRE1, PRM6, COS7, COS6, COS4, FLC1, COS2, GAS4, JEN1, SAG1, LCL2, DDR2, OPY2, YLR406C-A, FIT2, FIT3, SGA1, ATH1, HSV2, YFL040W, CPR8, HXT2, SMA2, YNL058C, YNL115C, AKR2, UIP5, PRY2, YCR101C, SSP120, SSH4, TIR2, RTA1, HXT17, YJL132W, FRE2, …	707	284	5861	1.92654	3.44673e-05	3.44679e-05	3.36845e-05
GOTERM_CC_DIRECT	GO:0005886~plasma membrane	95	11.5012	5.86457e-07	FCY21, WSC2, SKG1, FCY22, PLB3, ECM7, ARN1, ARN2, ARR3, YCR007C, HOL1, RIM21, RGS2, STE18, STE6, ALR2, STE4, STE5, GPA1, FRD1, SST2, BUD8, ASG7, EXG2, AAP1, SKT5, PRM1, YLR046C, THI7, AVO2, TOK1, MCH5, FLO1, PUG1, TRE1, YAR023C, YPS6, LAP2, GND2, COS2, DFG16, AQY2, GAS4, JEN1, YAR066W, YPS3, OPY2, FLR1, AMF1, ROD1, HXT2, MAL32, MFA1, SNC1, UIP3, MSC1, HXT7, ALP1, HXT4, HXT5, FMP45, SSA1, MST27, Y…	707	482	5861	1.63391	0.000180612	9.03143e-05	8.82617e-05
GOTERM_CC_DIRECT	GO:0009277~fungal-type cell wall	32	3.87409	7.15171e-06	FIT2, ATH1, FIT3, SPI1, PAU21, PAU1, PAU3, PAU9, PAU8, PAU5, PAU4, PAU7, FLO10, SSA1, SPR1, EXG2, NCA3, FLO1, AGA1, AGA2, PAU18, FIG2, FLO9, TIP1, TIR2, YPS6, GAS4, SPS2, SIM1, DAN4, SAG1, PIR3	707	114	5861	2.32701	0.00220031	0.000734242	0.000717555
GOTERM_CC_DIRECT	GO:0016021~integral component of membrane	205	24.8184	2.06089e-05	YPR071W, YFT2, WSC2, WSC3, MIM1, MME1, PAU3, FRT2, ARR3, ATG22, MCR1, PAU5, PAU4, YBR284W, BUD8, ECM27, YHR213W-A, YKR104W, ATG15, SHH3, SWF1, MDM31, PIC2, YOR186W, NFT1, SCO2, MAM3, PXA2, JEN1, YFR045W, YPL119C-A, SYM1, YLL053C, YNL115C, MST27, ATG39, TRK2, TRK1, PET309, SNF3, AAC1, MSB2, HXT17, FRE2, FRE4, FRE3, FRE6, MPO1, RRT6, STE2, ECM7, YHR078W, YOR032W-A, HOL1, YKR005C, YSR3, ARV1, YPR117…	707	1326	5861	1.28163	0.0063275	0.00158688	0.00155082
GOTERM_CC_DIRECT	GO:0016020~membrane	257	31.1138	3.21253e-05	ATF1, YPR071W, PEX27, YFT2, SPI1, WSC2, ATG26, WSC3, MIM1, MME1, PAU3, FRT2, ARR3, ATG23, ATG22, MCR1, PAU5, PAU4, YBR284W, VPS30, BUD8, ECM27, YHR213W-A, YKR104W, ATG15, SHH3, SWF1, MDM31, CDA2, PIC2, ATG11, YOR186W, NFT1, SCO2, MAM3, PXA2, JEN1, YFR045W, VPS25, UPS2, YPL119C-A, FIT2, FIT3, MPM1, SYM1, YLL053C, YNL115C, MST27, ATG39, TRK2, TRK1, PET309, SNF3, AAC1, YPT52, MSB2, HXT17, FRE2, GTF1…	707	1738	5861	1.22585	0.00984596	0.00197892	0.00193394
GOTERM_CC_DIRECT	GO:0005576~extracellular region	28	3.38983	0.000188546	BAR1, FIT2, FIT3, SPI1, YGP1, PLB3, MFA1, RNY1, THI22, FLO10, SSA1, SPR1, YOL159C, ICL1, EXG2, PRY2, FLO1, AGA1, YOR389W, FIG2, FLO9, TIP1, TIR2, MSB2, SIM1, DAN4, SAG1, PIR3	707	110	5861	2.11017	0.0564232	0.00891408	0.00871148
GOTERM_CC_DIRECT	GO:0071944~cell periphery	54	6.53753	0.000202593	BAR1, YPR071W, SPI1, FCY22, ARN1, YCR007C, HOL1, STE18, ALR2, IRC8, TDA6, THI7, TOK1, FLO1, AGA1, YDR034W-B, TIP1, JEN1, SAG1, RTN2, FIT2, FIT3, FLR1, YEL043W, ESBP6, AMF1, YLR326W, HXT2, MAL31, SNC1, HXT7, HXT4, HXT5, FMP45, FLO10, RGI1, YOL159C, SAY1, TRK2, TRK1, MPH2, PMA2, SNF3, FIG2, YFL054C, TIR2, MSB3, YOL075C, HXT17, CHS3, PDR10, RCH1, DAN4, MDM1	707	272	5861	1.6458	0.0604975	0.00891408	0.00871148
GOTERM_CC_DIRECT	GO:0005782~peroxisomal matrix	8	0.968523	0.000318223	PEX8, GPX1, DCI1, POT1, PCS60, POX1, LPX1, CTA1	707	13	5861	5.10151	0.0933767	0.0122516	0.0119731
GOTERM_CC_DIRECT	GO:0031225~anchored component of membrane	19	2.30024	0.000467734	FIT2, FIT3, SPI1, AGA1, PLB3, FLO1, FIG2, FLO9, TIP1, TIR2, YPS6, FLO10, GAS4, SPS2, DAN4, EXG2, YPS3, YAR066W, SAG1	707	65	5861	2.42322	0.134195	0.0160069	0.0156431
GOTERM_CC_DIRECT	GO:0005777~peroxisome	19	2.30024	0.00381275	PEX27, FOX2, CAT2, PCD1, PNC1, ATG36, PEX8, CTT1, PEX4, ESL2, PEX6, DCI1, POT1, YGR168C, PXA2, PCS60, POX1, LPX1, CTA1	707	77	5861	2.04557	0.691666	0.117433	0.114764
GOTERM_CC_DIRECT	GO:0005887~integral component of plasma membrane	25	3.02663	0.0107109	MAL11, STE2, YFL040W, ARR3, HXT2, MAL31, YLL053C, HXT7, ALP1, HXT4, HXT5, YBR219C, TRK2, TRK1, PCA1, MPH2, PMA2, FUS1, SNF3, PRM6, YFL054C, MSB2, HXT17, AQY2, OPY2	707	123	5861	1.68495	0.96373	0.299905	0.293089
GOTERM_CC_DIRECT	GO:0035974~meiotic spindle pole body	4	0.484262	0.0144288	ADY4, SPO21, SPO74, MPC54	707	5	5861	6.63197	0.988626	0.370338	0.361921
GOTERM_CC_DIRECT	GO:0005618~cell wall	15	1.81598	0.029628	FIT2, FIT3, SPI1, AGA1, FLO1, FIG2, FLO9, TIP1, TIR2, FLO10, SSA1, SIM1, DAN4, SAG1, PIR3	707	68	5861	1.82867	0.999905	0.701956	0.686002
GOTERM_CC_DIRECT	GO:0031422~RecQ helicase-Topo III complex	3	0.363196	0.039993	SGS1, RMI1, TOP3	707	3	5861	8.28996	0.999997	0.82119	0.802526
GOTERM_CC_DIRECT	GO:0030956~glutamyl-tRNA(Gln) amidotransferase complex	3	0.363196	0.039993	PET112, GTF1, HER2	707	3	5861	8.28996	0.999997	0.82119	0.802526
GOTERM_CC_DIRECT	GO:0034657~GID complex	4	0.484262	0.0612477	FYV10, GID8, RMD5, YGR066C	707	8	5861	4.14498	1	1	0.980456
GOTERM_CC_DIRECT	GO:0005834~heterotrimeric G-protein complex	3	0.363196	0.0736477	STE18, STE4, GPA1	707	4	5861	6.21747	1	1	0.980456
GOTERM_CC_DIRECT	GO:0005937~mating projection	4	0.484262	0.0838814	SPH1, HBT1, STE4, FIG2	707	9	5861	3.68443	1	1	0.980456
GOTERM_CC_DIRECT	GO:0005628~prospore membrane	14	1.69492	0.0865852	SGA1, SSP2, SHC1, SPO21, HOS3, SPO20, YFL040W, SMA2, YGL015C, SPR1, CHS3, OSW1, MPC54, YSW1	707	72	5861	1.61194	1	1	0.980456
Category	Term	Count	%	PValue	Genes	List Total	Pop Hits	Pop Total	Fold Enrichment	Bonferroni	Benjamini	FDR
GOTERM_MF_DIRECT	GO:0005215~transporter activity	21	2.54237	0.000785881	FCY21, THI7, FCY22, VHC1, ESBP6, YFL040W, MPH2, HXT2, YIA6, MAL31, SNF3, YLL053C, ATG22, AAC1, YFL054C, HXT7, HXT4, HXT5, HXT17, AQY2, YFR045W	551	84	4885	2.21642	0.384835	0.301372	0.301372
GOTERM_MF_DIRECT	GO:0005199~structural constituent of cell wall	14	1.69492	0.000975314	SPI1, PAU21, PAU1, PAU3, PAU18, PAU9, TIP1, PAU8, TIR2, PAU5, PAU4, PAU7, DAN4, PIR3	551	45	4885	2.75822	0.452853	0.301372	0.301372
GOTERM_MF_DIRECT	GO:0030246~carbohydrate binding	7	0.847458	0.00268974	YMR085W, ATH1, GAL10, YHR210C, YNR071C, EMP46, GFA1	551	14	4885	4.43285	0.810715	0.325166	0.325166
GOTERM_MF_DIRECT	GO:0005524~ATP binding	98	11.8644	0.00313335	SMK1, ISM1, YBT1, RCK1, YKR104W, ECM10, NFT1, SAK1, FRK1, YPL150W, PKP1, PXA2, VMR1, RIM15, ECM16, HSP82, PRP5, GRS2, HEF3, YGR109W-B, PGS1, SLT2, BIO4, SSA3, SSA4, MYO4, RAD24, SSA1, IRE1, SUV3, HSP78, PCK1, SRX1, MSR1, TAH11, PCA1, KSP1, HXK1, MRH4, RAD16, GTF1, RNR3, SPO11, KSS1, PRR2, YLL067C, MRK1, PFK26, THI20, IME2, STE6, THI21, DAK2, GAL1, APA2, KIN3, FBP26, THI6, YDR261C-D, PSK1, PEX4, S…	551	668	4885	1.30066	0.856217	0.325166	0.325166
GOTERM_MF_DIRECT	GO:0005355~glucose transmembrane transporter activity	10	1.21065	0.00342541	HXT7, HXT4, MAL11, HXT5, HXT17, MPH2, YFL040W, HXT2, MAL31, SNF3	551	29	4885	3.05714	0.880033	0.325166	0.325166
GOTERM_MF_DIRECT	GO:0016798~hydrolase activity, acting on glycosyl bonds	13	1.57385	0.00390046	ATH1, SGA1, MNL2, MAL32, GDB1, NTG1, NTG2, IMA4, IMA1, IMA5, SPR1, SIM1, EXG2	551	46	4885	2.50552	0.91065	0.325166	0.325166
GOTERM_MF_DIRECT	GO:0005537~mannose binding	5	0.605327	0.00420927	FLO9, FLO10, FLO1, EMP46, UIP5	551	7	4885	6.33264	0.926231	0.325166	0.325166
GOTERM_MF_DIRECT	GO:0018456~aryl-alcohol dehydrogenase (NAD+) activity	5	0.605327	0.00420927	AAD3, AAD14, AAD6, AAD4, YPL088W	551	7	4885	6.33264	0.926231	0.325166	0.325166
GOTERM_MF_DIRECT	GO:0004672~protein kinase activity	25	3.02663	0.00694986	IKS1, MEC1, KNS1, KSS1, SMK1, PRR2, MRK1, KDX1, RCK1, SLT2, SSK22, IME2, IRE1, KIN3, KSP1, PSK1, SAK1, FRK1, YPL150W, DBF2, KIN28, YPK2, PKP1, SKM1, RIM15	551	127	4885	1.74522	0.986567	0.431594	0.431594
GOTERM_MF_DIRECT	GO:0003700~transcription factor activity, sequence-specific DNA binding	16	1.93705	0.0074055	TOG1, HMS1, XBP1, FUN19, YGP1, CUP2, RFX1, ACA1, MGA1, YOR338W, GSM1, RDR1, TEC1, GAT4, NDT80, SMP1	551	68	4885	2.08605	0.989884	0.431594	0.431594
GOTERM_MF_DIRECT	GO:0016301~kinase activity	36	4.35835	0.00820399	IKS1, MEC1, KNS1, KSS1, SMK1, PRR2, MRK1, KDX1, RCK1, SLT2, PFK26, THI20, SSK22, IME2, THI21, YLR446W, IRE1, DAK2, GAL1, KIN3, GAL3, THI6, GUT1, KSP1, YHR033W, PSK1, SAK1, FRK1, YPL150W, HXK1, DBF2, KIN28, YPK2, PKP1, SKM1, RIM15	551	207	4885	1.54186	0.993848	0.431594	0.431594
GOTERM_MF_DIRECT	GO:0004674~protein serine/threonine kinase activity	24	2.90557	0.00838046	KIN3, IKS1, MEC1, KNS1, KSS1, SMK1, PRR2, KSP1, PSK1, MRK1, RCK1, SLT2, KDX1, SAK1, SSK22, IME2, FRK1, YPL150W, DBF2, KIN28, IRE1, YPK2, SKM1, RIM15	551	122	4885	1.74407	0.994489	0.431594	0.431594
GOTERM_MF_DIRECT	GO:0043565~sequence-specific DNA binding	30	3.63196	0.00911216	YGP1, MET32, MET31, YKL222C, HMLALPHA2, YPR196W, MGA1, GSM1, CMR3, TEC1, RLM1, GAT4, SMP1, CAT8, USV1, TOG1, YPR015C, XBP1, TOS8, MSN4, NRG1, RFX1, ACA1, RGT1, YRM1, RDR1, PPR1, YGR067C, NDT80, PDR8	551	165	4885	1.61195	0.996507	0.433178	0.433178
GOTERM_MF_DIRECT	GO:0016491~oxidoreductase activity	47	5.69007	0.0101161	YCR102C, FOX2, DIT2, YJR154W, HEM14, ALD3, LOT6, FDH1, ALD2, YDR541C, AAD6, XYL2, AAD4, MCR1, AAD3, CTT1, ADH2, YPR127W, FMP46, YKL107W, FRD1, OYE3, CTA1, SRX1, IDP2, YJR096W, GPX1, YKL070W, GDH2, YNR073C, GAL80, GUT2, YPL088W, FRM2, GND2, GCY1, AAD14, YJL045W, TSA2, FRE2, TRR2, FRE4, RNR3, FRE3, FRE6, POX1, YDL114W	551	292	4885	1.42701	0.998133	0.443052	0.443052
GOTERM_MF_DIRECT	GO:0022891~substrate-specific transmembrane transporter activity	10	1.21065	0.0107537	HXT7, HXT4, MAL11, HXT5, HXT17, MPH2, YFL040W, HXT2, MAL31, SNF3	551	34	4885	2.60756	0.998746	0.443052	0.443052
GOTERM_MF_DIRECT	GO:0005351~sugar:proton symporter activity	9	1.08959	0.0123002	HXT7, HXT4, HXT5, HXT17, MPH2, YFL040W, HXT2, MAL31, SNF3	551	29	4885	2.75142	0.999523	0.475095	0.475095
GOTERM_MF_DIRECT	GO:0042626~ATPase activity, coupled to transmembrane movement of substances	8	0.968523	0.0137784	NFT1, YKR104W, STE6, YOL075C, PDR10, PXA2, VMR1, YBT1	551	24	4885	2.95523	0.999811	0.500887	0.500887
GOTERM_MF_DIRECT	GO:0008138~protein tyrosine/serine/threonine phosphatase activity	4	0.484262	0.0218663	MSG5, SDP1, TEP1, PPS1	551	6	4885	5.91047	0.999999	0.748573	0.748573
GOTERM_MF_DIRECT	GO:0022857~transmembrane transporter activity	11	1.33172	0.0251755	HXT7, HXT4, MAL11, HXT5, HXT17, MPH2, YFL040W, HXT2, JEN1, MAL31, SNF3	551	45	4885	2.16717	1	0.748573	0.748573
GOTERM_MF_DIRECT	GO:0001077~transcriptional activator activity, RNA polymerase II core promoter proximal region sequence-specific binding	13	1.57385	0.0326663	TOG1, XBP1, YKL222C, ACA1, FLO8, RGT1, YRM1, TEC1, PPR1, HAP4, CAT8, PIP2, PDR8	551	60	4885	1.9209	1	0.748573	0.748573
GOTERM_MF_DIRECT	GO:0000981~RNA polymerase II transcription factor activity, sequence-specific DNA binding	16	1.93705	0.0345603	TOG1, XBP1, YKL222C, MSN4, YPR196W, GSM1, RGT1, YRM1, ZNF1, ARG81, RDR1, PPR1, OAF3, CAT8, PIP2, PDR8	551	81	4885	1.75125	1	0.748573	0.748573
GOTERM_MF_DIRECT	GO:0052851~ferric-chelate reductase (NADPH) activity	4	0.484262	0.035109	FRE2, FRE4, FRE3, FRE6	551	7	4885	5.06611	1	0.748573	0.748573
GOTERM_MF_DIRECT	GO:0050839~cell adhesion molecule binding	3	0.363196	0.0351272	AGA1, AGA2, SAG1	551	3	4885	8.8657	1	0.748573	0.748573
GOTERM_MF_DIRECT	GO:0004360~glutamine-fructose-6-phosphate transaminase (isomerizing) activity	3	0.363196	0.0351272	YMR084W, YMR085W, GFA1	551	3	4885	8.8657	1	0.748573	0.748573
GOTERM_MF_DIRECT	GO:0050334~thiaminase activity	3	0.363196	0.0351272	THI20, THI22, THI21	551	3	4885	8.8657	1	0.748573	0.748573
GOTERM_MF_DIRECT	GO:0008902~hydroxymethylpyrimidine kinase activity	3	0.363196	0.0351272	THI20, THI22, THI21	551	3	4885	8.8657	1	0.748573	0.748573
GOTERM_MF_DIRECT	GO:0008972~phosphomethylpyrimidine kinase activity	3	0.363196	0.0351272	THI20, THI22, THI21	551	3	4885	8.8657	1	0.748573	0.748573
GOTERM_MF_DIRECT	GO:0050567~glutaminyl-tRNA synthase (glutamine-hydrolyzing) activity	3	0.363196	0.0351272	PET112, GTF1, HER2	551	3	4885	8.8657	1	0.748573	0.748573
GOTERM_MF_DIRECT	GO:0004034~aldose 1-epimerase activity	3	0.363196	0.0351272	GAL10, YHR210C, YNR071C	551	3	4885	8.8657	1	0.748573	0.748573
GOTERM_MF_DIRECT	GO:0000978~RNA polymerase II core promoter proximal region sequence-specific DNA binding	15	1.81598	0.0461957	TOG1, XBP1, YKL222C, NRG1, CUP2, RFX1, FLO8, RGT1, YRM1, ARG81, TEC1, PPR1, CAT8, PIP2, PDR8	551	77	4885	1.72708	1	0.951632	0.951632
GOTERM_MF_DIRECT	GO:0015146~pentose transmembrane transporter activity	3	0.363196	0.0650505	HXT7, HXT4, HXT2	551	4	4885	6.64927	1	1	1
GOTERM_MF_DIRECT	GO:0004033~aldo-keto reductase (NADP) activity	3	0.363196	0.0650505	YJR096W, FOX2, GCY1	551	4	4885	6.64927	1	1	1
GOTERM_MF_DIRECT	GO:0000293~ferric-chelate reductase activity	4	0.484262	0.071056	FRE2, FRE4, FRE3, FRE6	551	9	4885	3.94031	1	1	1
GOTERM_MF_DIRECT	GO:0005353~fructose transmembrane transporter activity	5	0.605327	0.0792272	HXT7, HXT4, HXT5, HXT17, HXT2	551	15	4885	2.95523	1	1	1
GOTERM_MF_DIRECT	GO:0015578~mannose transmembrane transporter activity	5	0.605327	0.0792272	HXT7, HXT4, HXT5, HXT17, HXT2	551	15	4885	2.95523	1	1	1
GOTERM_MF_DIRECT	GO:0005096~GTPase activator activity	11	1.33172	0.083915	YRB2, BAG7, RGS2, MSB3, LST4, CIN1, NEL1, SST2, MUK1, MSB4, BUB2	551	55	4885	1.77314	1	1	1
GOTERM_MF_DIRECT	GO:0000166~nucleotide binding	107	12.954	0.0850491	NAB6, SMK1, ISM1, YBT1, RCK1, YKR104W, ECM10, PTI1, MRN1, NFT1, SAK1, FRK1, YPL150W, PKP1, PXA2, VMR1, RIM15, ECM16, HSP82, PRP5, GRS2, HEF3, YGR109W-B, PGS1, SLT2, BIO4, SSA3, SSA4, MYO4, RAD24, SSA1, IRE1, SUV3, HSP78, PCK1, SRX1, MEF2, MSR1, SSP2, PCA1, KSP1, YPT52, HXK1, MRH4, RAD16, GTF1, ZIP2, RNR3, KSS1, PRR2, YLL067C, MRK1, PFK26, THI20, IME2, STE6, THI21, GPA1, DAK2, GAL1, APA2, KIN3, FB…	551	834	4885	1.13745	1	1	1
GOTERM_MF_DIRECT	GO:0003677~DNA binding	66	7.99031	0.0874313	CTF13, SPO11, ECM5, HOP1, YPR196W, MGA1, YOR338W, CMR3, EXO1, ARG81, RLM1, GAT4, SMP1, USV1, HMS1, TOG1, RMI1, TOS8, YDR261C-D, NRG1, RFX1, ACA1, EST2, GAL80, NTG1, SGS1, NTG2, DMC1, TOP3, PPR1, YGR067C, HAP4, NDT80, PIP2, PDR8, FUN19, MET32, MET31, YKL222C, HMLALPHA1, HMLALPHA2, YHR177W, LIF1, CUP2, YGR109W-B, YGR109W-A, RRN7, GSM1, RDH54, TEC1, OAF3, CAT8, MHR1, SSL2, XBP1, TAH11, ECM32, MSN4, …	551	492	4885	1.1893	1	1	1
GOTERM_MF_DIRECT	GO:0004872~receptor activity	5	0.605327	0.0966378	COS6, COS4, COS2, SNF3, COS7	551	16	4885	2.77053	1	1	1
Category	Term	Count	%	PValue	Genes	List Total	Pop Hits	Pop Total	Fold Enrichment	Bonferroni	Benjamini	FDR
KEGG_PATHWAY	sce00500:Starch and sucrose metabolism	16	1.93705	5.09941e-07	ATH1, SGA1, TSL1, GSY1, FKS3, MAL32, GDB1, YHL012W, GPH1, HXK1, IMA4, YLR446W, IMA1, IMA5, SPR1, EXG2	194	40	2184	4.50309	4.23243e-05	4.23251e-05	3.97754e-05
KEGG_PATHWAY	sce04011:MAPK signaling pathway - yeast	15	1.81598	7.59823e-05	WSC2, WSC3, KSS1, MSN4, STE2, FUS1, MFA1, MSG5, SLT2, CTT1, STE18, SSK22, STE5, TEC1, RLM1	194	51	2184	3.3111	0.00628693	0.00306171	0.00287727
KEGG_PATHWAY	sce00052:Galactose metabolism	10	1.21065	0.000110664	GAL3, HXK1, IMA4, YLR446W, IMA1, GAL10, IMA5, MAL32, GAL1, YHL012W	194	24	2184	4.69072	0.00914358	0.00306171	0.00287727
KEGG_PATHWAY	sce04113:Meiosis - yeast	25	3.02663	0.000161571	MEC1, SPO12, SPO11, RED1, HOP1, HMLALPHA2, HXT2, HXT7, CLN2, HXT4, IME2, HXT5, RAD24, APC9, APC2, TAH11, MSN4, SNF3, REC8, ESP1, PPZ1, HXT17, DMC1, NDT80, RIM15	194	126	2184	2.23368	0.0133219	0.0033526	0.00315064
KEGG_PATHWAY	sce00520:Amino sugar and nucleotide sugar metabolism	10	1.21065	0.0012681	GAL3, MCR1, HXK1, YLR446W, GAL10, CHS3, CDA2, GFA1, GAL1, YHL012W	194	32	2184	3.51804	0.0999629	0.0210505	0.0197824
KEGG_PATHWAY	sce04146:Peroxisome	10	1.21065	0.00461622	CTT1, CAT2, PEX6, POT1, PXA2, YAT1, SYM1, POX1, CTA1, IDP2	194	38	2184	2.96256	0.318892	0.0638578	0.0600109
KEGG_PATHWAY	sce04931:Insulin resistance	5	0.605327	0.0166061	PPZ1, GPH1, GSY1, RRD2, GFA1	194	12	2184	4.69072	0.750895	0.196901	0.18504
KEGG_PATHWAY	sce01200:Carbon metabolism	18	2.17918	0.019767	ICL2, NQM1, SHH3, FDH1, CHA1, ERR1, CTT1, GND2, HXK1, YLR446W, YJL045W, TKL2, DAK2, PCK1, ICL1, FBP1, CTA1, IDP2	194	114	2184	1.77754	0.809307	0.205083	0.192728
KEGG_PATHWAY	sce00051:Fructose and mannose metabolism	6	0.726392	0.0322863	PFK26, FBP26, HXK1, YLR446W, YNR073C, FBP1	194	21	2184	3.21649	0.934387	0.297751	0.279815
KEGG_PATHWAY	sce00730:Thiamine metabolism	4	0.484262	0.051206	THI20, THI21, THI6, THI5	194	10	2184	4.50309	0.987257	0.42501	0.399407
KEGG_PATHWAY	sce03440:Homologous recombination	5	0.605327	0.079991	RAD50, SGS1, RDH54, RAD54, TOP3	194	19	2184	2.96256	0.999012	0.603569	0.567209

## Sheet: Supplementart_TableS2
Only Im Up 82 (81 DAVID IDs)
Category	Term	Count	%	PValue	Genes	List Total	Pop Hits	Pop Total	Fold Enrichment	Bonferroni	Benjamini	FDR
GOTERM_BP_DIRECT	GO:0007039~protein catabolic process in the vacuole	5	6.17284	1.2721e-05	YOR062C, PRB1, APE1, YBR139W, VID24	68	13	5557	31.431	0.00247754	0.0024806	0.0024806
GOTERM_BP_DIRECT	GO:0055085~transmembrane transport	11	13.5802	0.000529036	UGA4, DUR3, VBA1, AGP2, MCH4, VHT1, YBR241C, YBR287W, GAP1, DIP5, POR1	68	240	5557	3.74553	0.0980438	0.051581	0.051581
GOTERM_BP_DIRECT	GO:0006865~amino acid transport	5	6.17284	0.00215294	UGA4, VBA1, AGP2, GAP1, DIP5	68	46	5557	8.88267	0.343134	0.139941	0.139941
GOTERM_BP_DIRECT	GO:0003333~amino acid transmembrane transport	4	4.93827	0.00398445	UGA4, AGP2, GAP1, DIP5	68	27	5557	12.1068	0.540915	0.194242	0.194242
GOTERM_BP_DIRECT	GO:0009450~gamma-aminobutyric acid catabolic process	2	2.46914	0.0357426	UGA3, UGA1	68	3	5557	54.4804	0.999173	1	1
GOTERM_BP_DIRECT	GO:0032509~endosome transport via multivesicular body sorting pathway	2	2.46914	0.0357426	SNA2, SNA3	68	3	5557	54.4804	0.999173	1	1
GOTERM_BP_DIRECT	GO:0015847~putrescine transport	2	2.46914	0.0473748	UGA4, DUR3	68	4	5557	40.8603	0.999922	1	1
GOTERM_BP_DIRECT	GO:0006810~transport	16	19.7531	0.0615853	UGA4, APE1, MCH4, VHT1, PRM8, YBR287W, DIP5, VID24, YAT2, DUR3, VBA1, AGP2, YBR241C, GAP1, POR1, MEP2	68	822	5557	1.59067	0.999996	1	1
GOTERM_BP_DIRECT	GO:0006631~fatty acid metabolic process	3	3.7037	0.0627502	SCS7, FAA1, YAT2	68	34	5557	7.21064	0.999997	1	1
GOTERM_BP_DIRECT	GO:0044257~cellular protein catabolic process	2	2.46914	0.0702261	SNA2, SNA3	68	6	5557	27.2402	0.999999	1	1
GOTERM_BP_DIRECT	GO:0001080~nitrogen catabolite activation of transcription from RNA polymerase II promoter	2	2.46914	0.0814483	UGA3, GAT1	68	7	5557	23.3487	1	1	1
GOTERM_BP_DIRECT	GO:0019740~nitrogen utilization	2	2.46914	0.0814483	UGA3, MEP2	68	7	5557	23.3487	1	1	1
GOTERM_BP_DIRECT	GO:0000256~allantoin catabolic process	2	2.46914	0.0814483	DAL3, DAL2	68	7	5557	23.3487	1	1	1
GOTERM_BP_DIRECT	GO:0006144~purine nucleobase metabolic process	2	2.46914	0.0925372	DAL3, DAL2	68	8	5557	20.4301	1	1	1
Category	Term	Count	%	PValue	Genes	List Total	Pop Hits	Pop Total	Fold Enrichment	Bonferroni	Benjamini	FDR
GOTERM_CC_DIRECT	GO:0000328~fungal-type vacuole lumen	5	6.17284	7.62813e-06	PRB1, CPS1, GAP1, SNA2, SNA3	76	11	5861	35.0538	0.000488083	0.0004882	0.000480572
GOTERM_CC_DIRECT	GO:0005773~vacuole	11	13.5802	0.000281362	YOR062C, ICY1, UGA4, PRB1, VBA1, CPS1, APE1, YBR241C, SNA3, YBR139W, VID24	76	208	5861	4.07838	0.0178485	0.00900357	0.00886289
GOTERM_CC_DIRECT	GO:0000329~fungal-type vacuole membrane	9	11.1111	0.00554375	ICY1, UGA4, VBA1, AGP2, MCH4, YBR241C, SNA2, DIP5, SNA3	76	213	5861	3.25852	0.299378	0.118267	0.116419
GOTERM_CC_DIRECT	GO:0005887~integral component of plasma membrane	6	7.40741	0.0201304	UGA4, DUR3, AGP2, GAP1, DIP5, MEP2	76	123	5861	3.76187	0.727874	0.322087	0.317054
GOTERM_CC_DIRECT	GO:0016021~integral component of membrane	25	30.8642	0.038512	FUN14, UGA4, SNA2, DIP5, SNA3, YPC1, JID1, DUR3, VBA1, AGP2, YBR241C, GAP1, MEP2, MCH4, VHT1, PRM8, YBR287W, YER039C-A, YDR090C, SCS7, CPS1, RCR1, POR1, YPL264C, RIP1	76	1326	5861	1.45397	0.919014	0.492953	0.485251
GOTERM_CC_DIRECT	GO:0016020~membrane	29	35.8025	0.0922064	FUN14, UGA4, SNA2, DIP5, SNA3, YPC1, JID1, DUR3, VBA1, AGP2, YBR241C, NDI1, GAP1, MEP2, MCH4, VHT1, PRM8, YBR287W, YER039C-A, YDR090C, VID24, ICY1, SCS7, CPS1, RCR1, DAL3, POR1, YPL264C, RIP1	76	1738	5861	1.28679	0.997953	0.983535	0.968167
Category	Term	Count	%	PValue	Genes	List Total	Pop Hits	Pop Total	Fold Enrichment	Bonferroni	Benjamini	FDR
GOTERM_MF_DIRECT	GO:0015171~amino acid transmembrane transporter activity	4	4.93827	0.00323768	UGA4, AGP2, GAP1, DIP5	58	26	4885	12.9576	0.371072	0.326717	0.326717
GOTERM_MF_DIRECT	GO:0015293~symporter activity	3	3.7037	0.00456947	DUR3, MCH4, VHT1	58	9	4885	28.0747	0.480523	0.326717	0.326717
GOTERM_MF_DIRECT	GO:0015297~antiporter activity	4	4.93827	0.0102257	UGA4, AGP2, GAP1, DIP5	58	39	4885	8.63837	0.770031	0.487427	0.487427
GOTERM_MF_DIRECT	GO:0030170~pyridoxal phosphate binding	4	4.93827	0.0142238	SRY1, CAR2, UGA1, STR2	58	44	4885	7.65674	0.871087	0.508502	0.508502
GOTERM_MF_DIRECT	GO:0016829~lyase activity	5	6.17284	0.0258733	SRY1, SNZ1, PDH1, DAL3, NCE103	58	97	4885	4.34145	0.976449	0.739977	0.739977
GOTERM_MF_DIRECT	GO:0015489~putrescine transmembrane transporter activity	2	2.46914	0.0346053	UGA4, DUR3	58	3	4885	56.1494	0.993502	0.820047	0.820047
GOTERM_MF_DIRECT	GO:0043565~sequence-specific DNA binding	6	7.40741	0.0422043	UGA3, CUP9, GAT1, RIM101, DAL80, MET28	58	165	4885	3.0627	0.997901	0.820047	0.820047
GOTERM_MF_DIRECT	GO:0015203~polyamine transmembrane transporter activity	2	2.46914	0.0458768	AGP2, GAP1	58	4	4885	42.1121	0.998788	0.820047	0.820047
GOTERM_MF_DIRECT	GO:0004180~carboxypeptidase activity	2	2.46914	0.0680333	CPS1, YBR139W	58	6	4885	28.0747	0.999958	1	1
Category	Term	Count	%	PValue	Genes	List Total	Pop Hits	Pop Total	Fold Enrichment	Bonferroni	Benjamini	FDR
KEGG_PATHWAY	sce01100:Metabolic pathways	15	18.5185	0.00521805	CAR2, UGA1, STR2, GLK1, GPP2, FAA1, YPC1, GPM2, CAB2, URA8, SER3, DAL3, DAL2, CIT1, RIP1	25	682	2184	1.92141	0.201455	0.224376	0.224376
KEGG_PATHWAY	sce01130:Biosynthesis of antibiotics	6	7.40741	0.0795574	CAR2, SER3, STR2, GLK1, CIT1, GPM2	25	215	2184	2.43795	0.971695	1	1

## Sheet: Supplementart_TableS3
Only Dox Down 274 (273 DAVID IDs)
Category	Term	Count	%	PValue	Genes	List Total	Pop Hits	Pop Total	Fold Enrichment	Bonferroni	Benjamini	FDR
GOTERM_BP_DIRECT	GO:0008652~cellular amino acid biosynthetic process	37	13.5531	4.1149e-24	MET14, BAT1, TRP4, MDE1, ASN1, SER33, MET3, SER2, LEU1, MET8, ILV2, MET5, HIS1, MET6, ARG7, LYS12, ARG4, ILV5, CPA2, HIS2, ILV3, ARG3, HIS7, ORT1, LYS1, ARO4, CYS4, ARO3, HOM3, HOM2, ARO1, LYS2, LYS9, ACO2, LYS20, LYS21, MET17	260	97	5557	8.15262	2.58827e-21	2.58827e-21	2.49363e-21
GOTERM_BP_DIRECT	GO:0008152~metabolic process	38	13.9194	6.57526e-09	BAT1, TRP4, URA2, GPM3, SER33, SER2, LEU1, SCW11, PFK2, MET8, FAS1, PFK1, ADE17, ERG6, MET5, EXG1, ARG7, ILV3, TPI1, HIS7, EPT1, ERG12, GPP1, HOM3, ARO1, SUN4, LYS2, PHO13, DCD1, HXK2, ACO1, ACO2, BNA7, PYC2, RNR1, DSE4, MET17, ACS2	260	284	5557	2.85978	4.13583e-06	2.06792e-06	1.9923e-06
GOTERM_BP_DIRECT	GO:0009085~lysine biosynthetic process	8	2.9304	4.69607e-08	LYS9, LYS1, ACO2, LYS20, HOM2, LYS21, LYS2, LYS12	260	10	5557	17.0985	2.95379e-05	9.8461e-06	9.48606e-06
GOTERM_BP_DIRECT	GO:0006164~purine nucleotide biosynthetic process	9	3.2967	5.82895e-07	ADE12, IMD2, IMD3, ADE13, ADE8, ADE6, ADE17, ADE4, ADE2	260	18	5557	10.6865	0.000366574	9.16602e-05	8.83085e-05
GOTERM_BP_DIRECT	GO:0009086~methionine biosynthetic process	11	4.0293	1.0572e-06	MET22, MET14, MET3, MET13, MDE1, MET8, HOM3, HOM2, MET5, MET6, MET17	260	32	5557	7.347	0.000664759	0.000132996	0.000128133
GOTERM_BP_DIRECT	GO:0019878~lysine biosynthetic process via aminoadipic acid	7	2.5641	1.73645e-06	LYS9, LYS1, ACO2, LYS20, LYS21, LYS2, LYS12	260	10	5557	14.9612	0.00109163	0.000182038	0.000175382
GOTERM_BP_DIRECT	GO:0002181~cytoplasmic translation	23	8.42491	1.16571e-05	RPL36A, RPS7B, RPL13A, RPL24A, RPL22B, RPS1A, RPL31B, RPS24B, RPL8B, RPS26B, RPS16B, RPL18A, RPS9A, RPL17A, RPS10B, RPL4B, RPL17B, RPS11A, RPS22A, RPL27B, RPS17B, RPL8A, RPS18A	260	171	5557	2.87474	0.00730551	0.00104747	0.00100917
GOTERM_BP_DIRECT	GO:0006189~'de novo' IMP biosynthetic process	6	2.1978	2.28644e-05	ADE13, ADE8, ADE6, ADE17, ADE4, ADE2	260	9	5557	14.2487	0.014279	0.00179772	0.00173198
GOTERM_BP_DIRECT	GO:0006412~translation	32	11.7216	5.99329e-05	ODC2, TIF4631, OAC1, KRS1, RPL36A, RPL24A, YMC1, RPL22B, CTP1, GGC1, RPL18A, RPS9A, RPS11A, RPS17B, ORT1, ALA1, RPS7B, RPL13A, RPS1A, RPL31B, RPS24B, DED1, RPL8B, RPS26B, RPS16B, RPL17A, RPL4B, RPL17B, RPS22A, RPL27B, RPS18A, RPL8A	260	318	5557	2.15075	0.0369972	0.00418865	0.00403548
GOTERM_BP_DIRECT	GO:0006526~arginine biosynthetic process	6	2.1978	7.75933e-05	ARG4, CPA2, ARG3, ORT1, URA2, ARG7	260	11	5557	11.658	0.0476361	0.00488062	0.00470215
GOTERM_BP_DIRECT	GO:0006096~glycolytic process	8	2.9304	0.000135063	TPI1, HXK2, PFK2, PGK1, PFK1, ENO1, TDH1, GPM3	260	26	5557	6.57633	0.0814514	0.0075691	0.00729232
GOTERM_BP_DIRECT	GO:0006555~methionine metabolic process	5	1.8315	0.000144402	SAH1, MET13, SAM1, SAM2, MET17	260	7	5557	15.2665	0.0868323	0.0075691	0.00729232
GOTERM_BP_DIRECT	GO:0006799~polyphosphate biosynthetic process	4	1.4652	0.000386676	VTC1, VTC2, VTC3, VTC4	260	4	5557	21.3731	0.215937	0.0187092	0.018025
GOTERM_BP_DIRECT	GO:0006797~polyphosphate metabolic process	5	1.8315	0.00077491	VTC1, VTC2, VTC3, VTC4, PHO84	260	10	5557	10.6865	0.385906	0.0299502	0.028855
GOTERM_BP_DIRECT	GO:0009097~isoleucine biosynthetic process	5	1.8315	0.00077491	ILV5, BAT1, ILV3, ILV2, HOM2	260	10	5557	10.6865	0.385906	0.0299502	0.028855
GOTERM_BP_DIRECT	GO:0000103~sulfate assimilation	5	1.8315	0.00077491	MET22, MET14, MET3, MET8, MET5	260	10	5557	10.6865	0.385906	0.0299502	0.028855
GOTERM_BP_DIRECT	GO:0006520~cellular amino acid metabolic process	7	2.5641	0.000809464	AAT2, ARG3, MAE1, URA2, SPS100, HOM2, MET17	260	25	5557	5.98446	0.39912	0.0299502	0.028855
GOTERM_BP_DIRECT	GO:0006333~chromatin assembly or disassembly	6	2.1978	0.00109901	HAT2, HTB1, HTA2, HHT1, HTB2, HTA1	260	18	5557	7.12436	0.499254	0.036383	0.0350526
GOTERM_BP_DIRECT	GO:0006730~one-carbon metabolic process	6	2.1978	0.00109901	SAH1, MET13, SAM1, SAM2, MET8, SHM2	260	18	5557	7.12436	0.499254	0.036383	0.0350526
GOTERM_BP_DIRECT	GO:0006094~gluconeogenesis	6	2.1978	0.00143542	TPI1, PGK1, ENO1, PYC2, TDH1, GPM3	260	19	5557	6.74939	0.594861	0.0451439	0.0434932
GOTERM_BP_DIRECT	GO:0019344~cysteine biosynthetic process	5	1.8315	0.00169608	MET14, MET3, CYS4, MET5, MET17	260	12	5557	8.90545	0.656215	0.0492931	0.0474907
GOTERM_BP_DIRECT	GO:0000050~urea cycle	4	1.4652	0.00180245	CPA2, CAR1, ARG3, URA2	260	6	5557	14.2487	0.678502	0.0492931	0.0474907
GOTERM_BP_DIRECT	GO:0070814~hydrogen sulfide biosynthetic process	4	1.4652	0.00180245	MET14, MET3, CYS4, MET5	260	6	5557	14.2487	0.678502	0.0492931	0.0474907
GOTERM_BP_DIRECT	GO:0009082~branched-chain amino acid biosynthetic process	5	1.8315	0.00236096	ILV5, BAT1, ILV3, LEU1, ILV2	260	13	5557	8.22041	0.773905	0.0618768	0.0596143
GOTERM_BP_DIRECT	GO:0055114~oxidation-reduction process	29	10.6227	0.00284601	MAE1, MET13, ADH5, YPR172W, SER33, ADH1, MET8, FAS1, RSM26, CYC1, ERG5, MET5, LYS12, ZTA1, ILV5, MDH3, LYS1, SVL3, HOM2, ARO1, LIA1, LYS2, LYS9, IMD2, IMD3, GND1, GPD1, RNR1, TDH1	260	347	5557	1.78622	0.833489	0.0716056	0.0689873
GOTERM_BP_DIRECT	GO:0009099~valine biosynthetic process	4	1.4652	0.00304599	ILV5, BAT1, ILV3, ILV2	260	7	5557	12.2132	0.853225	0.0736895	0.070995
GOTERM_BP_DIRECT	GO:0051453~regulation of intracellular pH	4	1.4652	0.00470664	SUL1, PFK2, PMA1, PFK1	260	8	5557	10.6865	0.948566	0.109647	0.105638
GOTERM_BP_DIRECT	GO:0007034~vacuolar transport	6	2.1978	0.00521591	EMP70, VTC1, VTC2, VTC3, VTC4, TMN2	260	25	5557	5.12954	0.962723	0.117172	0.112887
GOTERM_BP_DIRECT	GO:0048016~inositol phosphate-mediated signaling	3	1.0989	0.00629263	VTC2, VTC3, VTC4	260	3	5557	21.3731	0.981137	0.136485	0.131494
GOTERM_BP_DIRECT	GO:0016237~lysosomal microautophagy	4	1.4652	0.00681869	VTC1, VTC2, VTC3, VTC4	260	9	5557	9.49915	0.986481	0.142965	0.137737
GOTERM_BP_DIRECT	GO:0071555~cell wall organization	11	4.0293	0.0116176	PAU23, WSC4, SCW11, UTR2, GAS1, DSE1, DSE2, PIR1, EXG1, SUN4, KNH1	260	94	5557	2.5011	0.999358	0.235572	0.226958
GOTERM_BP_DIRECT	GO:0009423~chorismate biosynthetic process	3	1.0989	0.0121986	ARO4, ARO3, ARO1	260	4	5557	16.0298	0.999556	0.235572	0.226958
GOTERM_BP_DIRECT	GO:0001403~invasive growth in response to glucose limitation	7	2.5641	0.0123591	SNF1, EMP70, RXT2, WHI3, TMN2, DSE1, ASC1	260	42	5557	3.56218	0.999599	0.235572	0.226958
GOTERM_BP_DIRECT	GO:0009058~biosynthetic process	6	2.1978	0.0132879	AAT2, PSA1, ARO4, ADE8, NMA1, ARO3	260	31	5557	4.13672	0.999778	0.245826	0.236837
GOTERM_BP_DIRECT	GO:0007124~pseudohyphal growth	8	2.9304	0.0144657	SNF1, EMP70, WHI3, HMS2, ITR1, TMN2, SFG1, DSE2	260	56	5557	3.0533	0.999895	0.257442	0.248029
GOTERM_BP_DIRECT	GO:0006541~glutamine metabolic process	5	1.8315	0.0147344	HIS7, URA2, ADE6, ASN1, ADE4	260	21	5557	5.08883	0.999912	0.257442	0.248029
GOTERM_BP_DIRECT	GO:0009073~aromatic amino acid family biosynthetic process	4	1.4652	0.0160976	TRP4, ARO4, ARO3, ARO1	260	12	5557	7.12436	0.999963	0.273658	0.263652
GOTERM_BP_DIRECT	GO:0016311~dephosphorylation	8	2.9304	0.0189172	MET22, HIS2, SER2, LCB3, GPP1, PHO5, OPI1, PHO11	260	59	5557	2.89804	0.999994	0.31313	0.30168
GOTERM_BP_DIRECT	GO:0005975~carbohydrate metabolic process	11	4.0293	0.0197991	SNF1, MIG2, HXK2, MDH3, SCW11, GPD1, UTR2, GAS1, EXG1, PCL10, SUN4	260	102	5557	2.30494	0.999997	0.317936	0.306311
GOTERM_BP_DIRECT	GO:0006807~nitrogen compound metabolic process	4	1.4652	0.0202185	CPA2, DCG1, URA2, GLN1	260	13	5557	6.57633	0.999997	0.317936	0.306311
GOTERM_BP_DIRECT	GO:0000122~negative regulation of transcription from RNA polymerase II promoter	11	4.0293	0.0223787	NCB2, RXT2, ABF1, MIG2, TUP1, CBF1, RAP1, HTB1, OPI1, SPT2, HTA1	260	104	5557	2.26061	0.999999	0.343322	0.330768
GOTERM_BP_DIRECT	GO:0006090~pyruvate metabolic process	4	1.4652	0.0248639	MAE1, ARO10, PYC2, ACS2	260	14	5557	6.10659	1	0.372366	0.35875
GOTERM_BP_DIRECT	GO:0070911~global genome nucleotide-excision repair	3	1.0989	0.0389082	ABF1, DOT1, HHT1	260	7	5557	9.15989	1	0.543851	0.523964
GOTERM_BP_DIRECT	GO:0046939~nucleotide phosphorylation	3	1.0989	0.0389082	ADK2, URA6, ADK1	260	7	5557	9.15989	1	0.543851	0.523964
GOTERM_BP_DIRECT	GO:0006796~phosphate-containing compound metabolic process	3	1.0989	0.0389082	PHO81, PHO5, PHO11	260	7	5557	9.15989	1	0.543851	0.523964
GOTERM_BP_DIRECT	GO:0055085~transmembrane transport	18	6.59341	0.0542057	ODC2, SUL1, OAC1, ITR1, PMA1, GNP1, ATO3, TNA1, CTP1, VCX1, HXT1, GGC1, QDR3, PHO89, FCY2, TPO1, AGP1, PHO84	260	240	5557	1.60298	1	0.741204	0.714102
GOTERM_BP_DIRECT	GO:0000920~cell separation after cytokinesis	4	1.4652	0.0558199	EGT2, DSE1, DSE2, DSE4	260	19	5557	4.4996	1	0.747036	0.71972
GOTERM_BP_DIRECT	GO:0006207~'de novo' pyrimidine nucleobase biosynthetic process	3	1.0989	0.0627345	CPA2, URA6, URA2	260	9	5557	7.12436	1	0.822084	0.792023
GOTERM_BP_DIRECT	GO:0006116~NADH oxidation	3	1.0989	0.0760659	ADH1, GPD1, ADH5	260	10	5557	6.41192	1	0.920105	0.886461
GOTERM_BP_DIRECT	GO:0000105~histidine biosynthetic process	3	1.0989	0.0760659	HIS2, HIS7, HIS1	260	10	5557	6.41192	1	0.920105	0.886461
GOTERM_BP_DIRECT	GO:0006569~tryptophan catabolic process	3	1.0989	0.0760659	ARO10, BNA7, BNA5	260	10	5557	6.41192	1	0.920105	0.886461
GOTERM_BP_DIRECT	GO:0007029~endoplasmic reticulum organization	3	1.0989	0.0760659	RTN1, SWC3, SEY1	260	10	5557	6.41192	1	0.920105	0.886461
GOTERM_BP_DIRECT	GO:0008202~steroid metabolic process	4	1.4652	0.0891646	ERG12, ERG5, KES1, ERG6	260	23	5557	3.71706	1	0.923732	0.889955
GOTERM_BP_DIRECT	GO:0006656~phosphatidylcholine biosynthetic process	3	1.0989	0.0901923	SAH1, EPT1, OPI3	260	11	5557	5.82902	1	0.923732	0.889955
GOTERM_BP_DIRECT	GO:0019752~carboxylic acid metabolic process	3	1.0989	0.0901923	MDH3, LYS20, LYS21	260	11	5557	5.82902	1	0.923732	0.889955
GOTERM_BP_DIRECT	GO:0043458~ethanol biosynthetic process involved in glucose fermentation to ethanol	2	0.732601	0.0910515	ADH1, ADH5	260	2	5557	21.3731	1	0.923732	0.889955
GOTERM_BP_DIRECT	GO:0042450~arginine biosynthetic process via ornithine	2	0.732601	0.0910515	ARG4, ARG3	260	2	5557	21.3731	1	0.923732	0.889955
GOTERM_BP_DIRECT	GO:0061615~glycolytic process through fructose-6-phosphate	2	0.732601	0.0910515	PFK2, PFK1	260	2	5557	21.3731	1	0.923732	0.889955
GOTERM_BP_DIRECT	GO:0044208~'de novo' AMP biosynthetic process	2	0.732601	0.0910515	ADE12, ADE13	260	2	5557	21.3731	1	0.923732	0.889955
GOTERM_BP_DIRECT	GO:0046033~AMP metabolic process	2	0.732601	0.0910515	ADK2, ADK1	260	2	5557	21.3731	1	0.923732	0.889955
GOTERM_BP_DIRECT	GO:0006172~ADP biosynthetic process	2	0.732601	0.0910515	ADK2, ADK1	260	2	5557	21.3731	1	0.923732	0.889955
GOTERM_BP_DIRECT	GO:0006091~generation of precursor metabolites and energy	2	0.732601	0.0910515	LYS9, LYS1	260	2	5557	21.3731	1	0.923732	0.889955
GOTERM_BP_DIRECT	GO:0006629~lipid metabolic process	12	4.3956	0.0965129	KEI1, CHO1, EPT1, PHO81, FAS1, ERG12, LCB3, ERG5, KES1, OPI1, ERG6, OPI3	260	152	5557	1.68735	1	0.963597	0.928362
Category	Term	Count	%	PValue	Genes	List Total	Pop Hits	Pop Total	Fold Enrichment	Bonferroni	Benjamini	FDR
GOTERM_CC_DIRECT	GO:0005737~cytoplasm	143	52.381	4.29507e-06	POP5, UME1, ALF1, HGH1, PEX21, ENO1, RPL22B, ARR1, GPM3, SER33, RPL18A, RPS9A, AAH1, PHO81, FAS1, PCL10, ASC1, CPA2, HIS2, HIS7, MBF1, HEK2, HMS2, CYS4, RPS7B, ERG12, NMA1, SVL3, AGE2, PHO13, RPS24B, DCD1, RPL17A, RPL17B, HAT2, GPD1, KES1, PYC2, ARB1, TIF4631, IGO2, CLB1, MDE1, URA2, ASN1, ADH5, HMF1, ADH1, YBL029W, URA6, RPS11A, PGK1, CIT2, AAT2, SNF1, HEM3, ALA1, ARO10, GLN1, NRM1, RPS1A, LIA1,…	267	2344	5861	1.33918	0.000742773	0.000743047	0.000712982
GOTERM_CC_DIRECT	GO:0005618~cell wall	13	4.7619	4.45716e-05	EGT2, PAU23, SUN4, KNH1, SCW11, UTR2, TOS6, GAS1, PRY3, DSE2, PIR1, EXG1, DSE4	267	68	5861	4.19657	0.00768141	0.00385544	0.00369944
GOTERM_CC_DIRECT	GO:0005576~extracellular region	16	5.86081	0.000116089	EGT2, PAU23, SUN4, KNH1, SCW11, UTR2, TOS6, GAS1, PRY3, PHO5, DSE2, PIR1, EXG1, PHO11, DSE4, MET6	267	110	5861	3.19292	0.0198842	0.00669447	0.00642359
GOTERM_CC_DIRECT	GO:0009277~fungal-type cell wall	16	5.86081	0.000174747	EGT2, PAU23, SUN4, KNH1, SCW11, UTR2, TOS6, GAS1, PRY3, PHO5, DSE2, PIR1, EXG1, PHO11, DSE4, TDH1	267	114	5861	3.08089	0.0297814	0.0075578	0.00725199
GOTERM_CC_DIRECT	GO:0022627~cytosolic small ribosomal subunit	12	4.3956	0.000350641	RPS24B, RPS26B, RPS16B, RPS9A, RPS10B, RPS11A, RPS22A, RPS7B, RPS1A, RPS17B, RPS18A, ASC1	267	72	5861	3.65855	0.0588676	0.00943337	0.00905167
GOTERM_CC_DIRECT	GO:0033254~vacuolar transporter chaperone complex	4	1.4652	0.000357457	VTC1, VTC2, VTC3, VTC4	267	4	5861	21.9513	0.0599771	0.00943337	0.00905167
GOTERM_CC_DIRECT	GO:0000786~nucleosome	5	1.8315	0.000436225	HTB1, HTA2, HHT1, HTB2, HTA1	267	9	5861	12.1952	0.0727049	0.00943337	0.00905167
GOTERM_CC_DIRECT	GO:0000788~nuclear nucleosome	5	1.8315	0.000436225	HTB1, HTA2, HHT1, HTB2, HTA1	267	9	5861	12.1952	0.0727049	0.00943337	0.00905167
GOTERM_CC_DIRECT	GO:0030529~intracellular ribonucleoprotein complex	27	9.89011	0.00154451	RPL36A, RPL24A, RPL22B, NPL3, SMX2, RPL18A, RPS9A, RPS11A, RSM26, RPS17B, UTP5, RPS7B, RPL13A, RPS1A, RPL31B, RPS24B, RPL8B, RPS26B, RPS16B, RPL17A, RPS10B, RPL4B, RPL17B, RPS22A, RPL27B, RPS18A, RPL8A	267	309	5861	1.91808	0.234639	0.029689	0.0284877
GOTERM_CC_DIRECT	GO:0005840~ribosome	25	9.15751	0.00467703	RPL36A, RPL24A, RPL22B, RPL18A, RPS9A, RPS11A, RSM26, RPS17B, RPS7B, RPL13A, RPS1A, RPL31B, RPS24B, RPL8B, RPS26B, RPS16B, RPL17A, RPS10B, RPL4B, RPL17B, RPS22A, RPL27B, RPS18A, RPL8A, ARB1	267	301	5861	1.8232	0.555597	0.0740514	0.0710551
GOTERM_CC_DIRECT	GO:0005622~intracellular	19	6.95971	0.00470847	ARF1, HIS7, RPL36A, RPS7B, RPL13A, RPL22B, RPS1A, RPL31B, RPS24B, THO1, RPS26B, RPL18A, RPS9A, RPL17A, RPL17B, RPS11A, RPL27B, RPS17B, RPS18A	267	203	5861	2.05456	0.558019	0.0740514	0.0710551
GOTERM_CC_DIRECT	GO:0022625~cytosolic large ribosomal subunit	12	4.3956	0.00946267	RPL8B, RPL18A, RPL17A, RPL4B, RPL17B, RPL27B, RPL36A, RPL13A, RPL24A, RPL22B, RPL8A, RPL31B	267	108	5861	2.43903	0.806956	0.13642	0.1309
GOTERM_CC_DIRECT	GO:0071944~cell periphery	22	8.05861	0.0113859	RTN1, VTC4, ITR1, GNP1, ATO3, SEY1, SVL3, TNA1, OPI3, HXT1, LYS9, QDR3, FCY2, SCW11, INA1, TPO1, PNS1, PRY3, PMP2, PHO5, MET5, PHO11	267	272	5861	1.77547	0.862077	0.15152	0.145389
GOTERM_CC_DIRECT	GO:0031298~replication fork protection complex	5	1.8315	0.0319613	HTB1, HTA2, HHT1, HTB2, HTA1	267	27	5861	4.06506	0.996374	0.394951	0.37897
GOTERM_CC_DIRECT	GO:0005694~chromosome	12	4.3956	0.0349923	HEK2, CBF1, SET2, RAP1, MCD1, HTB1, HTA2, NHP6A, HHT1, HTB2, HTA1, TBF1	267	131	5861	2.01081	0.997892	0.403578	0.387248
GOTERM_CC_DIRECT	GO:0005887~integral component of plasma membrane	11	4.0293	0.051942	SUL1, PHO89, ITR1, PMA1, PNS1, AGP1, GNP1, PHO84, TNA1, HXT1, MEP3	267	123	5861	1.96313	0.999902	0.514085	0.493284
GOTERM_CC_DIRECT	GO:0034399~nuclear periphery	7	2.5641	0.0533418	PPH22, GAS1, GLN1, OPI1, PIR1, GTT3, PPH3	267	60	5861	2.56099	0.999924	0.514085	0.493284
GOTERM_CC_DIRECT	GO:0010494~cytoplasmic stress granule	9	3.2967	0.0534886	TIF4631, DED1, WHI3, SAM1, SAM2, LEU1, CYS4, NPL3, MET5	267	91	5861	2.17101	0.999926	0.514085	0.493284
GOTERM_CC_DIRECT	GO:0009986~cell surface	4	1.4652	0.0595334	SCW11, EXG1, DSE4, SUN4	267	20	5861	4.39026	0.999976	0.542067	0.520134
GOTERM_CC_DIRECT	GO:0031310~intrinsic component of vacuolar membrane	2	0.732601	0.0887171	VTC1, VTC4	267	2	5861	21.9513	1	0.73086	0.701288
GOTERM_CC_DIRECT	GO:0005945~6-phosphofructokinase complex	2	0.732601	0.0887171	PFK2, PFK1	267	2	5861	21.9513	1	0.73086	0.701288
GOTERM_CC_DIRECT	GO:0005739~mitochondrion	64	23.4432	0.0929887	MET13, MAE1, OAC1, ENO1, CTP1, OPI3, GGC1, SWC3, SAP4, PFK2, FAS1, PFK1, ERG6, ILV5, ILV3, TPI1, ARG3, MBF1, ORT1, MCD1, CYS4, GNP1, ATO3, ARO3, TNA1, ADK2, GND1, GPD1, ADK1, GAS1, ODC2, TIF4631, BAT1, MIG2, RTN1, URA2, YMC1, MIC19, HMF1, MET3, CBF1, TIM10, PGK1, RSM26, CYC1, CIT2, ILV2, ARG7, LYS12, AAT2, EHT1, SNF1, ALA1, PMA1, MRH1, HXK2, CHO1, GDS1, ACO1, ACO2, LYS20, LYS21, TDH1, RPS18A	267	1189	5861	1.18157	1	0.731229	0.701642
Category	Term	Count	%	PValue	Genes	List Total	Pop Hits	Pop Total	Fold Enrichment	Bonferroni	Benjamini	FDR
GOTERM_MF_DIRECT	GO:0003824~catalytic activity	42	15.3846	1.06259e-07	BAT1, TRP4, URA2, GPM3, ADE13, PFK2, MET8, FAS1, PFK1, ADE17, ILV2, MET5, ARG7, AAT2, ARG4, CPA2, HIS2, ILV3, TPI1, HIS7, MDH3, ARO10, EPT1, ARO4, GLN1, NMA1, ARO3, ARO1, ADE2, LYS2, IMD2, IMD3, DCD1, HXK2, LYS20, SHM2, PYC2, RNR1, LYS21, MET17, ACS2, BNA5	241	353	4885	2.41169	4.19716e-05	4.19724e-05	4.15474e-05
GOTERM_MF_DIRECT	GO:0003735~structural constituent of ribosome	30	10.989	4.67243e-05	ODC2, OAC1, RPL36A, RPL24A, YMC1, RPL22B, CTP1, GGC1, RPL18A, RPS9A, RPS11A, RSM26, RPS17B, ORT1, RPS7B, RPL13A, RPS1A, RPL31B, RPS24B, RPL8B, RPS26B, RPS16B, RPL17A, RPS10B, RPL4B, RPL17B, RPS22A, RPL27B, RPS18A, RPL8A	241	271	4885	2.24388	0.0182873	0.00829353	0.00820954
GOTERM_MF_DIRECT	GO:0016829~lyase activity	16	5.86081	6.29888e-05	ARG4, ILV3, HIS7, MDE1, ARO10, CYS4, ENO1, SPE2, ARO1, ADE2, LEU1, ADE13, MET8, FAS1, ACO1, ACO2	241	97	4885	3.34346	0.0245744	0.00829353	0.00820954
GOTERM_MF_DIRECT	GO:0016597~amino acid binding	5	1.8315	0.000340203	SER33, ARG3, ALA1, URA2, HOM3	241	8	4885	12.6686	0.125762	0.033595	0.0332548
GOTERM_MF_DIRECT	GO:0051287~NAD binding	7	2.5641	0.00199679	SAH1, SER33, MAE1, GPD1, HOM2, TDH1, LYS12	241	28	4885	5.06743	0.545938	0.134536	0.133174
GOTERM_MF_DIRECT	GO:0016491~oxidoreductase activity	27	9.89011	0.00204359	MAE1, MET13, ADH5, YPR172W, SER33, ADH1, MET8, FAS1, ERG5, MET5, LYS12, ZTA1, ILV5, MDH3, LYS1, SVL3, HOM2, ARO1, LIA1, LYS2, LYS9, IMD2, IMD3, GND1, GPD1, RNR1, TDH1	241	292	4885	1.87425	0.554271	0.134536	0.133174
GOTERM_MF_DIRECT	GO:0016740~transferase activity	51	18.6813	0.00260497	MET14, DOT1, OPI3, SET2, PFK2, FAS1, PFK1, ADE17, ERG6, MNN1, ARG3, HIS7, TDA1, ARO4, ERG12, ARO3, NMA1, ARO1, ADK2, YPK3, ADK1, GAS1, SHM2, MET17, BAT1, TRP4, URA2, MNN10, MET3, URA6, PGK1, CIT2, ILV2, HIS1, MET6, ARG7, AAT2, EHT1, SNF1, HEM3, ADE8, EPT1, ADE4, HOM3, SAM1, HXK2, SAM2, PSA1, CHO1, LYS20, LYS21	241	694	4885	1.48956	0.643102	0.146995	0.145506
GOTERM_MF_DIRECT	GO:0046982~protein heterodimerization activity	7	2.5641	0.00556959	NCB2, TAF6, HTB1, HTA2, HHT1, HTB2, HTA1	241	34	4885	4.17318	0.889875	0.274999	0.272214
GOTERM_MF_DIRECT	GO:0019205~nucleobase-containing compound kinase activity	3	1.0989	0.00697821	ADK2, URA6, ADK1	241	3	4885	20.2697	0.93709	0.306266	0.303164
GOTERM_MF_DIRECT	GO:0000287~magnesium ion binding	9	3.2967	0.0204477	ADE12, MET22, SER2, ARO10, GPP1, ENO1, ILV2, HIS1, LYS12	241	70	4885	2.60611	0.999714	0.78219	0.774269
GOTERM_MF_DIRECT	GO:0000822~inositol hexakisphosphate binding	3	1.0989	0.0217825	VTC2, VTC3, VTC4	241	5	4885	12.1618	0.999833	0.78219	0.774269
GOTERM_MF_DIRECT	GO:0004017~adenylate kinase activity	3	1.0989	0.0316251	ADK2, URA6, ADK1	241	6	4885	10.1349	0.999997	1	0.992386
GOTERM_MF_DIRECT	GO:0003714~transcription corepressor activity	4	1.4652	0.0408107	NCB2, UME1, WTM2, OPI1	241	16	4885	5.06743	1	1	0.992386
GOTERM_MF_DIRECT	GO:0051539~4 iron, 4 sulfur cluster binding	5	1.8315	0.0460146	ILV3, LEU1, ACO1, ACO2, MET5	241	28	4885	3.61959	1	1	0.992386
GOTERM_MF_DIRECT	GO:0030170~pyridoxal phosphate binding	6	2.1978	0.0626883	AAT2, BAT1, CYS4, SHM2, BNA5, MET17	241	44	4885	2.76405	1	1	0.992386
GOTERM_MF_DIRECT	GO:0046912~transferase activity, transferring acyl groups, acyl groups converted into alkyl on transfer	3	1.0989	0.0688815	CIT2, LYS20, LYS21	241	9	4885	6.75657	1	1	0.992386
GOTERM_MF_DIRECT	GO:0003729~mRNA binding	15	5.49451	0.071912	TIF4631, VTC1, HEK2, MDH3, KRS1, LYS1, CYS4, NPL3, IMD2, DED1, IMD3, RPS26B, WHI3, PFK2, DCP1	241	186	4885	1.63465	1	1	0.992386
GOTERM_MF_DIRECT	GO:0046872~metal ion binding	47	17.2161	0.0758994	MAE1, MIG2, PPH22, MDE1, URA2, ENO1, ADH5, PPH3, ADE12, ADH1, SER2, TIM10, LEU1, AAH1, PFK2, PFK1, RSM26, CYC1, ERG5, ILV2, MET5, MET6, LYS12, ILV5, MET22, CPA2, ILV3, CAR1, ALA1, ARO10, PMA1, ADE6, GPP1, ADE4, AGE2, ARO1, LIA1, ADE2, VCX1, IMD2, IMD3, DCD1, SAM1, SAM2, ACO1, ACO2, PYC2	241	764	4885	1.24696	1	1	0.992386
GOTERM_MF_DIRECT	GO:0004070~aspartate carbamoyltransferase activity	2	0.732601	0.0958558	CPA2, URA2	241	2	4885	20.2697	1	1	0.992386
GOTERM_MF_DIRECT	GO:0004087~carbamoyl-phosphate synthase (ammonia) activity	2	0.732601	0.0958558	CPA2, URA2	241	2	4885	20.2697	1	1	0.992386
GOTERM_MF_DIRECT	GO:0004478~methionine adenosyltransferase activity	2	0.732601	0.0958558	SAM1, SAM2	241	2	4885	20.2697	1	1	0.992386
GOTERM_MF_DIRECT	GO:0003849~3-deoxy-7-phosphoheptulonate synthase activity	2	0.732601	0.0958558	ARO4, ARO3	241	2	4885	20.2697	1	1	0.992386
GOTERM_MF_DIRECT	GO:0016776~phosphotransferase activity, phosphate group as acceptor	2	0.732601	0.0958558	ADK2, ADK1	241	2	4885	20.2697	1	1	0.992386
GOTERM_MF_DIRECT	GO:0003994~aconitate hydratase activity	2	0.732601	0.0958558	ACO1, ACO2	241	2	4885	20.2697	1	1	0.992386
GOTERM_MF_DIRECT	GO:0016743~carboxyl- or carbamoyltransferase activity	2	0.732601	0.0958558	ARG3, URA2	241	2	4885	20.2697	1	1	0.992386
GOTERM_MF_DIRECT	GO:0004410~homocitrate synthase activity	2	0.732601	0.0958558	LYS20, LYS21	241	2	4885	20.2697	1	1	0.992386
GOTERM_MF_DIRECT	GO:0003872~6-phosphofructokinase activity	2	0.732601	0.0958558	PFK2, PFK1	241	2	4885	20.2697	1	1	0.992386
Category	Term	Count	%	PValue	Genes	List Total	Pop Hits	Pop Total	Fold Enrichment	Bonferroni	Benjamini	FDR
KEGG_PATHWAY	sce01230:Biosynthesis of amino acids	45	16.4835	1.62678e-23	BAT1, TRP4, ENO1, GPM3, SER33, SER2, LEU1, PFK2, PGK1, PFK1, CIT2, ILV2, HIS1, MET6, ARG7, LYS12, AAT2, ARG4, ILV5, HIS2, ILV3, CAR1, ARG3, TPI1, HIS7, LYS1, ARO4, CYS4, GLN1, ARO3, HOM3, HOM2, ARO1, LYS2, LYS9, SAM1, SAM2, ACO1, ACO2, LYS20, SHM2, PYC2, LYS21, TDH1, MET17	146	123	2184	5.47277	1.17128e-21	1.17128e-21	8.94729e-22
KEGG_PATHWAY	sce01130:Biosynthesis of antibiotics	53	19.4139	4.34637e-19	ENO1, GPM3, SER33, ADE13, PFK2, PFK1, ADE17, ERG5, ERG6, ARG4, ILV5, MET22, ILV3, TPI1, ARG3, LYS1, ARO4, CYS4, ERG12, ARO3, ARO1, LYS2, LYS9, ADK2, GND1, ADK1, SHM2, MET17, BAT1, ADH5, ADH1, MET3, SER2, PGK1, CIT2, ILV2, ARG7, LYS12, AAT2, CAR1, MDH3, ADE8, ADE6, ADE4, HOM3, HOM2, HXK2, ACO1, ACO2, LYS20, LYS21, TDH1, ACS2	146	215	2184	3.68754	3.12939e-17	1.38358e-17	1.0569e-17
KEGG_PATHWAY	sce01110:Biosynthesis of secondary metabolites	62	22.7106	5.76491e-19	ENO1, OPI3, GPM3, LEU1, ADE13, PFK2, PFK1, ADE17, ERG6, ARG4, ILV5, HIS2, ILV3, TPI1, ARG3, HIS7, LYS1, ARO4, ERG12, ARO3, ARO1, LYS2, IMD2, LYS9, IMD3, ADK2, GND1, GPD1, ADK1, SHM2, MET17, BAT1, TRP4, ASN1, ADH5, ADH1, MET8, PGK1, CIT2, ILV2, HIS1, MET6, ARG7, AAT2, CAR1, HEM3, MDH3, ADE8, EPT1, ADE6, ADE4, HOM3, HOM2, ADE2, SAM1, HXK2, SAM2, PSA1, CHO1, ACO1, TDH1, ACS2	146	295	2184	3.14391	4.15073e-17	1.38358e-17	1.0569e-17
KEGG_PATHWAY	sce01100:Metabolic pathways	95	34.7985	5.05024e-18	MET14, MET13, ENO1, SPE2, OPI3, GPM3, ADE12, SAH1, SER33, LEU1, ADE13, AAH1, PFK2, FAS1, PFK1, GPI8, ADE17, ERG5, ERG6, MNN1, ARG4, ILV5, HIS2, MET22, CPA2, ILV3, TPI1, ARG3, HIS7, LYS1, ARO4, CYS4, ERG12, ARO3, NMA1, GPP1, ARO1, LYS2, IMD2, LYS9, IMD3, DCD1, ADK2, GND1, ADK1, SHM2, PYC2, MET17, BAT1, TRP4, MDE1, URA2, ASN1, MNN10, ADH5, ADH1, MET3, SER2, URA6, MET8, PGK1, CIT2, ILV2, MET5, HIS1,…	146	682	2184	2.08372	3.63617e-16	9.09043e-17	6.94408e-17
KEGG_PATHWAY	sce01210:2-Oxocarboxylic acid metabolism	15	5.49451	1.20799e-08	ILV5, AAT2, BAT1, ILV3, HOM3, HOM2, LEU1, ACO1, ACO2, CIT2, LYS20, LYS21, ILV2, ARG7, LYS12	146	35	2184	6.41096	8.69756e-07	1.73951e-07	1.32879e-07
KEGG_PATHWAY	sce00300:Lysine biosynthesis	9	3.2967	1.23527e-07	LYS9, LYS1, ACO2, HOM3, LYS20, HOM2, LYS21, LYS2, LYS12	146	12	2184	11.2192	8.89387e-06	1.48232e-06	1.13233e-06
KEGG_PATHWAY	sce00270:Cysteine and methionine metabolism	12	4.3956	1.07784e-05	AAT2, SAH1, SAM1, SAM2, MDH3, MDE1, CYS4, SPE2, HOM3, HOM2, MET6, MET17	146	36	2184	4.9863	0.000775751	0.000110864	8.46878e-05
KEGG_PATHWAY	sce01200:Carbon metabolism	21	7.69231	3.35313e-05	AAT2, MAE1, TPI1, MET13, MDH3, ENO1, GPM3, SER33, SER2, GND1, HXK2, PFK2, PGK1, PFK1, ACO1, CIT2, SHM2, PYC2, TDH1, MET17, ACS2	146	114	2184	2.75559	0.00241138	0.000301781	0.000230527
KEGG_PATHWAY	sce00250:Alanine, aspartate and glutamate metabolism	9	3.2967	0.000520696	ADE12, AAT2, ARG4, CPA2, ADE13, URA2, GLN1, ASN1, ADE4	146	30	2184	4.48767	0.0368054	0.00416556	0.00318203
KEGG_PATHWAY	sce00680:Methane metabolism	8	2.9304	0.00178353	SER33, SER2, PFK2, PFK1, ENO1, SHM2, GPM3, ACS2	146	28	2184	4.27397	0.120612	0.0128414	0.00980944
KEGG_PATHWAY	sce03010:Ribosome	23	8.42491	0.00306864	RPL36A, RPS7B, RPL13A, RPL24A, RPL22B, RPS1A, RPL31B, RPS24B, RPL8B, RPS26B, RPS16B, RPL18A, RPS9A, RPL17A, RPS10B, RPL4B, RPL17B, RPS11A, RPS22A, RPL27B, RPS17B, RPL8A, RPS18A	146	181	2184	1.90086	0.198509	0.019437	0.0148477
KEGG_PATHWAY	sce00230:Purine metabolism	15	5.49451	0.00356322	MET14, ADE8, ADE6, ADE4, ADE2, ADE12, IMD2, IMD3, MET3, ADK2, ADK1, ADE13, AAH1, ADE17, RNR1	146	96	2184	2.33733	0.22664	0.019437	0.0148477
KEGG_PATHWAY	sce00220:Arginine biosynthesis	6	2.1978	0.00388309	AAT2, ARG4, CAR1, ARG3, GLN1, ARG7	146	17	2184	5.27961	0.244312	0.019437	0.0148477
KEGG_PATHWAY	sce00010:Glycolysis / Gluconeogenesis	11	4.0293	0.00401187	ADH1, TPI1, HXK2, PFK2, PGK1, PFK1, ENO1, ADH5, TDH1, GPM3, ACS2	146	58	2184	2.83703	0.251314	0.019437	0.0148477
KEGG_PATHWAY	sce00260:Glycine, serine and threonine metabolism	8	2.9304	0.00404938	SER33, SER2, CHO1, CYS4, HOM3, SHM2, HOM2, GPM3	146	32	2184	3.73973	0.253341	0.019437	0.0148477
KEGG_PATHWAY	sce00290:Valine, leucine and isoleucine biosynthesis	5	1.8315	0.00606527	ILV5, BAT1, ILV3, LEU1, ILV2	146	12	2184	6.23288	0.354693	0.0272937	0.0208494
KEGG_PATHWAY	sce00920:Sulfur metabolism	5	1.8315	0.00831489	MET22, MET14, MET3, MET5, MET17	146	13	2184	5.75342	0.451833	0.035216	0.0269011
KEGG_PATHWAY	sce00261:Monobactam biosynthesis	3	1.0989	0.0125645	MET3, HOM3, HOM2	146	3	2184	14.9589	0.597626	0.0502578	0.0383914
KEGG_PATHWAY	sce00400:Phenylalanine, tyrosine and tryptophan biosynthesis	5	1.8315	0.0224836	AAT2, TRP4, ARO4, ARO3, ARO1	146	17	2184	4.39968	0.805495	0.0852011	0.0650842
KEGG_PATHWAY	sce00630:Glyoxylate and dicarboxylate metabolism	6	2.1978	0.0254437	MDH3, GLN1, ACO1, CIT2, SHM2, BNA7	146	26	2184	3.45205	0.84365	0.0915975	0.0699703
KEGG_PATHWAY	sce00051:Fructose and mannose metabolism	5	1.8315	0.0460208	TPI1, HXK2, PSA1, PFK2, PFK1	146	21	2184	3.56164	0.966364	0.157786	0.120531
KEGG_PATHWAY	sce00310:Lysine degradation	4	1.4652	0.0607795	LYS9, SET2, LYS1, DOT1	146	14	2184	4.27397	0.989054	0.198915	0.151949
KEGG_PATHWAY	sce00770:Pantothenate and CoA biosynthesis	4	1.4652	0.0723984	ILV5, BAT1, ILV3, ILV2	146	15	2184	3.98904	0.995533	0.217195	0.165913
KEGG_PATHWAY	sce00670:One carbon pool by folate	4	1.4652	0.0723984	MET13, ADE8, ADE17, SHM2	146	15	2184	3.98904	0.995533	0.217195	0.165913

## Sheet: Supplementart_TableS4
Only Im Down 87 (87 DAVID IDs)
Category	Term	Count	%	PValue	Genes	List Total	Pop Hits	Pop Total	Fold Enrichment	Bonferroni	Benjamini	FDR
GOTERM_BP_DIRECT	GO:0055085~transmembrane transport	14	16.092	1.76841e-05	ECM3, NRT1, TAT1, AAC3, DTR1, AQR1, AQY1, GEX1, HXT14, YOR365C, BAP3, PXA1, BAP2, YOL162W	77	240	5557	4.20985	0.0036011	0.00360756	0.00346609
GOTERM_BP_DIRECT	GO:0031167~rRNA methylation	7	8.04598	0.000135925	UTP14, NOP58, RRP5, DHR2, UTP22, UTP23, UTP20	77	59	5557	8.5624	0.0273495	0.0138643	0.0133206
GOTERM_BP_DIRECT	GO:0006364~rRNA processing	11	12.6437	0.000442485	UTP14, NOP58, SEN1, RRP5, DHR2, UTP22, FYV7, UTP23, REX4, UTP20, CGR1	77	206	5557	3.85368	0.0863309	0.030089	0.028909
GOTERM_BP_DIRECT	GO:0000480~endonucleolytic cleavage in 5'-ETS of tricistronic rRNA transcript (SSU-rRNA, 5.8S rRNA, LSU-rRNA)	5	5.74713	0.000768377	UTP14, NOP58, RRP5, UTP23, UTP20	77	31	5557	11.6401	0.145133	0.0354597	0.0340692
GOTERM_BP_DIRECT	GO:0000472~endonucleolytic cleavage to generate mature 5'-end of SSU-rRNA from (SSU-rRNA, 5.8S rRNA, LSU-rRNA)	5	5.74713	0.000869111	UTP14, NOP58, RRP5, UTP23, UTP20	77	32	5557	11.2764	0.162535	0.0354597	0.0340692
GOTERM_BP_DIRECT	GO:0055114~oxidation-reduction process	13	14.9425	0.00238389	JLP1, BNA2, ZWF1, NDE1, SPS19, MTO1, MXR1, DUS3, IMD4, CYB5, GCV1, GCV2, SOR2	77	347	5557	2.70373	0.385468	0.0775953	0.0745523
GOTERM_BP_DIRECT	GO:0000447~endonucleolytic cleavage in ITS1 to separate SSU-rRNA from 5.8S rRNA and LSU-rRNA from tricistronic rRNA transcript (SSU-rRNA, 5.8S rRNA, LSU-rRNA)	5	5.74713	0.00266258	UTP14, NOP58, RRP5, UTP23, UTP20	77	43	5557	8.39172	0.419515	0.0775953	0.0745523
GOTERM_BP_DIRECT	GO:0030435~sporulation resulting in formation of a cellular spore	7	8.04598	0.0040751	CRR1, IME1, LDS2, SPO75, SPR3, SPS19, DTR1	77	112	5557	4.51055	0.565265	0.103915	0.0998399
GOTERM_BP_DIRECT	GO:0030476~ascospore wall assembly	5	5.74713	0.00462347	CRR1, GIP1, LDS2, SPO75, DTR1	77	50	5557	7.21688	0.611466	0.104799	0.100689
GOTERM_BP_DIRECT	GO:0042254~ribosome biogenesis	9	10.3448	0.00548503	UTP14, NOP58, RRP5, DHR2, UTP22, UTP23, UTP20, CGR1, REI1	77	199	5557	3.26392	0.67438	0.111895	0.107506
GOTERM_BP_DIRECT	GO:0008033~tRNA processing	6	6.89655	0.00854788	DUS3, SEN1, TRL1, TRM11, TAD2, MTO1	77	93	5557	4.65605	0.826446	0.158524	0.152308
GOTERM_BP_DIRECT	GO:0006400~tRNA modification	4	4.5977	0.0136858	DUS3, TRM11, TAD2, MTO1	77	37	5557	7.80204	0.939866	0.232658	0.223535
GOTERM_BP_DIRECT	GO:0030437~ascospore formation	4	4.5977	0.0320309	AQY1, SPO75, SPR3, SPS19	77	51	5557	5.6603	0.998695	0.502639	0.482928
GOTERM_BP_DIRECT	GO:0006810~transport	18	20.6897	0.0490644	NRT1, SPO75, ATG10, EFM4, TAT1, AAC3, DTR1, AQR1, YML018C, AQY1, GEX1, HXT14, YBR220C, BAP3, BCP1, PXA1, BAP2, YOL162W	77	822	5557	1.58034	0.999965	0.643295	0.618067
GOTERM_BP_DIRECT	GO:0003333~amino acid transmembrane transport	3	3.44828	0.0519876	BAP3, TAT1, BAP2	77	27	5557	8.01876	0.999981	0.643295	0.618067
GOTERM_BP_DIRECT	GO:0006546~glycine catabolic process	2	2.29885	0.0536079	GCV1, GCV2	77	4	5557	36.0844	0.999987	0.643295	0.618067
GOTERM_BP_DIRECT	GO:0006544~glycine metabolic process	2	2.29885	0.0536079	GCV1, GCV2	77	4	5557	36.0844	0.999987	0.643295	0.618067
GOTERM_BP_DIRECT	GO:0018022~peptidyl-lysine methylation	2	2.29885	0.0665605	EFM4, EFM6	77	5	5557	28.8675	0.999999	0.754352	0.72477
GOTERM_BP_DIRECT	GO:0000462~maturation of SSU-rRNA from tricistronic rRNA transcript (SSU-rRNA, 5.8S rRNA, LSU-rRNA)	4	4.5977	0.0725856	DHR2, UTP22, FYV7, UTP23	77	71	5557	4.06585	1	0.77934	0.748777
Category	Term	Count	%	PValue	Genes	List Total	Pop Hits	Pop Total	Fold Enrichment	Bonferroni	Benjamini	FDR
GOTERM_CC_DIRECT	GO:0005628~prospore membrane	7	8.04598	0.000408299	GIP1, YGL138C, LDS2, RRT5, SPR3, CWP1, DTR1	81	72	5861	7.03481	0.0277851	0.0226716	0.0220145
GOTERM_CC_DIRECT	GO:0032040~small-subunit processome	6	6.89655	0.000657149	UTP14, NOP58, RRP5, UTP22, UTP23, UTP20	81	52	5861	8.349	0.0443449	0.0226716	0.0220145
GOTERM_CC_DIRECT	GO:0005730~nucleolus	11	12.6437	0.00354598	UTP14, NOP58, RRP5, DHR2, UTP22, FYV7, UTP23, REX4, AIR1, UTP20, CGR1	81	271	5861	2.93704	0.217379	0.0815574	0.0791935
GOTERM_CC_DIRECT	GO:0005619~ascospore wall	3	3.44828	0.0111135	CRR1, LDS2, SPR3	81	12	5861	18.0895	0.537506	0.191707	0.186151
GOTERM_CC_DIRECT	GO:0005654~nucleoplasm	7	8.04598	0.0186891	UTP14, NOP58, RRP5, DHR2, UTP22, UTP23, UTP20	81	155	5861	3.26778	0.727944	0.257909	0.250434
GOTERM_CC_DIRECT	GO:0005887~integral component of plasma membrane	6	6.89655	0.025829	AQY1, HXT14, YBR220C, BAP3, TAT1, BAP2	81	123	5861	3.52966	0.835628	0.297033	0.288424
GOTERM_CC_DIRECT	GO:0005960~glycine cleavage complex	2	2.29885	0.0535039	GCV1, GCV2	81	4	5861	36.179	0.977499	0.527395	0.512109
GOTERM_CC_DIRECT	GO:0031160~spore wall	2	2.29885	0.0917672	CRR1, LDS2	81	7	5861	20.6737	0.998695	0.731745	0.710535
GOTERM_CC_DIRECT	GO:0030686~90S preribosome	4	4.5977	0.095445	NOP58, RRP5, UTP22, UTP20	81	80	5861	3.6179	0.999014	0.731745	0.710535
Category	Term	Count	%	PValue	Genes	List Total	Pop Hits	Pop Total	Fold Enrichment	Bonferroni	Benjamini	FDR
GOTERM_MF_DIRECT	GO:0016491~oxidoreductase activity	11	12.6437	0.0059224	DUS3, JLP1, ZWF1, BNA2, NDE1, IMD4, SPS19, GCV2, SOR2, MTO1, MXR1	68	292	4885	2.70623	0.55418	0.805446	0.805446
GOTERM_MF_DIRECT	GO:0015297~antiporter activity	4	4.5977	0.0158503	GEX1, BAP3, TAT1, BAP2	68	39	4885	7.36802	0.886154	1	1
GOTERM_MF_DIRECT	GO:0005215~transporter activity	5	5.74713	0.0274727	AQR1, NRT1, AQY1, HXT14, AAC3	68	84	4885	4.27609	0.977372	1	1
GOTERM_MF_DIRECT	GO:0003676~nucleic acid binding	9	10.3448	0.0403891	RRP5, DHR2, MIP6, RRT5, TRM11, REX4, AIR1, GFD2, REI1	68	286	4885	2.26064	0.996328	1	1
GOTERM_MF_DIRECT	GO:0003729~mRNA binding	7	8.04598	0.0410522	DUS3, SLF1, NOP58, SEN1, RRP5, IMD4, UTP20	68	186	4885	2.70359	0.996657	1	1
GOTERM_MF_DIRECT	GO:0015171~amino acid transmembrane transporter activity	3	3.44828	0.048754	BAP3, TAT1, BAP2	68	26	4885	8.28903	0.998884	1	1
GOTERM_MF_DIRECT	GO:0004375~glycine dehydrogenase (decarboxylating) activity	2	2.29885	0.0537596	GCV1, GCV2	68	4	4885	35.9191	0.999455	1	1
Category	Term	Count	%	PValue	Genes	List Total	Pop Hits	Pop Total	Fold Enrichment	Bonferroni	Benjamini	FDR
KEGG_PATHWAY	sce01200:Carbon metabolism	5	5.74713	0.0211452	AGX1, ZWF1, GCV1, RKI1, GCV2	22	114	2184	4.35407	0.40126	0.241416	0.191121
KEGG_PATHWAY	sce00630:Glyoxylate and dicarboxylate metabolism	3	3.44828	0.0249129	AGX1, GCV1, GCV2	22	26	2184	11.4545	0.454189	0.241416	0.191121
KEGG_PATHWAY	sce00260:Glycine, serine and threonine metabolism	3	3.44828	0.0367296	AGX1, GCV1, GCV2	22	32	2184	9.30682	0.59266	0.241416	0.191121
KEGG_PATHWAY	sce01130:Biosynthesis of antibiotics	6	6.89655	0.0484185	AGX1, ZWF1, INO1, GCV1, RKI1, GCV2	22	215	2184	2.7704	0.696118	0.241416	0.191121
KEGG_PATHWAY	sce04146:Peroxisome	3	3.44828	0.050295	AGX1, SPS19, PXA1	22	38	2184	7.83732	0.710179	0.241416	0.191121
KEGG_PATHWAY	sce01100:Metabolic pathways	11	12.6437	0.0849008	AGX1, ZWF1, BNA2, INO1, GCV1, IMD4, PGU1, RKI1, GCV2, SOR2, FUR1	22	682	2184	1.60117	0.881085	0.339603	0.268852

## Sheet: Supplementart_TableS5
Common Down 22 genes
Category	Term	Count	%	PValue	Genes	List Total	Pop Hits	Pop Total	Fold Enrichment	Bonferroni	Benjamini	FDR
GOTERM_BP_DIRECT	GO:0055114~oxidation-reduction process	6	27.2727	0.00401505	DLD1, ALD6, ALD5, YHB1, MTD1, BNA4	19	347	5557	5.05718	0.257485	0.257485	4.12346
GOTERM_BP_DIRECT	GO:0006068~ethanol catabolic process	2	9.09091	0.0064684	ALD6, ALD5	19	2	5557	292.474	0.381351	0.213457	6.56673
GOTERM_BP_DIRECT	GO:0019413~acetate biosynthetic process	2	9.09091	0.0128973	ALD6, ALD5	19	4	5557	146.237	0.617339	0.273998	12.7044
No CC
Category	Term	Count	%	PValue	Genes	List Total	Pop Hits	Pop Total	Fold Enrichment	Bonferroni	Benjamini	FDR
GOTERM_MF_DIRECT	GO:0016491~oxidoreductase activity	6	27.2727	0.00186385	DLD1, ALD6, ALD5, YHB1, MTD1, BNA4	17	292	4885	5.90451	0.094145	0.094145	1.80369
GOTERM_MF_DIRECT	GO:0004030~aldehyde dehydrogenase [NAD(P)+] activity	2	9.09091	0.0130411	ALD6, ALD5	17	4	4885	143.676	0.501287	0.293804	12.021
GOTERM_MF_DIRECT	GO:0004029~aldehyde dehydrogenase (NAD) activity	2	9.09091	0.0354801	ALD6, ALD5	17	11	4885	52.246	0.852602	0.471761	29.7038
GOTERM_MF_DIRECT	GO:0071949~FAD binding	2	9.09091	0.0354801	YHB1, BNA4	17	11	4885	52.246	0.852602	0.471761	29.7038
GOTERM_MF_DIRECT	GO:0016620~oxidoreductase activity, acting on the aldehyde or oxo group of donors, NAD or NADP as acceptor	2	9.09091	0.0480868	ALD6, ALD5	17	15	4885	38.3137	0.926606	0.479507	38.172
GOTERM_MF_DIRECT	GO:0050660~flavin adenine dinucleotide binding	2	9.09091	0.0819632	DLD1, BNA4	17	26	4885	22.1041	0.989246	0.59606	56.5845
Category	Term	Count	%	PValue	Genes	List Total	Pop Hits	Pop Total	Fold Enrichment	Bonferroni	Benjamini	FDR
KEGG_PATHWAY	sce00620:Pyruvate metabolism	4	18.1818	0.000579769	DLD1, ALD6, ALD5, LEU9	11	39	2184	20.3636	0.0121048	0.0121048	0.446789
KEGG_PATHWAY	sce00380:Tryptophan metabolism	3	13.6364	0.00247474	ALD6, ALD5, BNA4	11	17	2184	35.0374	0.0507033	0.0256814	1.89502
KEGG_PATHWAY	sce00340:Histidine metabolism	2	9.09091	0.058071	ALD6, ALD5	11	13	2184	30.5455	0.715304	0.34215	36.9936
KEGG_PATHWAY	sce00410:beta-Alanine metabolism	2	9.09091	0.058071	ALD6, ALD5	11	13	2184	30.5455	0.715304	0.34215	36.9936
KEGG_PATHWAY	sce00280:Valine, leucine and isoleucine degradation	2	9.09091	0.058071	ALD6, ALD5	11	13	2184	30.5455	0.715304	0.34215	36.9936
KEGG_PATHWAY	sce00310:Lysine degradation	2	9.09091	0.0624097	ALD6, ALD5	11	14	2184	28.3636	0.74161	0.287034	39.2001
KEGG_PATHWAY	sce00071:Fatty acid degradation	2	9.09091	0.0838346	ALD6, ALD5	11	19	2184	20.8995	0.84098	0.307706	49.1388
KEGG_PATHWAY	sce00330:Arginine and proline metabolism	2	9.09091	0.0922804	ALD6, ALD5	11	21	2184	18.9091	0.869086	0.287424	52.6489

## Sheet: Supplementart_TableS6
Common Up 107 genes
Category	Term	Count	%	PValue	Genes	List Total	Pop Hits	Pop Total	Fold Enrichment	Bonferroni	Benjamini	FDR
GOTERM_BP_DIRECT	GO:0055114~oxidation-reduction process	13	12.1495	0.00609857	AAD10, THI4, IRC15, NDE2, GOR1, QCR2, HBN1, CYC7, YJR149W, AIM17, PRX1, SDH1, GDH3	86	347	5557	2.42078	0.814043	0.814043	7.74922
GOTERM_BP_DIRECT	GO:0055085~transmembrane transport	10	9.34579	0.0105635	ENA5, PUT4, TPO2, YDL206W, YDL199C, FUR4, DAL5, CRC1, SAM3, VPS73	86	240	5557	2.69234	0.946089	0.767813	13.0666
GOTERM_BP_DIRECT	GO:0000290~deadenylation-dependent decapping of nuclear-transcribed mRNA	3	2.80374	0.0213379	EDC2, DCS1, DCS2	86	15	5557	12.9233	0.997345	0.861536	24.7533
GOTERM_BP_DIRECT	GO:0034599~cellular response to oxidative stress	5	4.6729	0.033493	MTL1, VHR1, HBN1, PRX1, HSP12	86	80	5557	4.03852	0.999915	0.903873	36.1855
GOTERM_BP_DIRECT	GO:0043086~negative regulation of catalytic activity	3	2.80374	0.0402311	IGD1, DCS2, HUG1	86	21	5557	9.2309	0.999988	0.895488	41.8088
GOTERM_BP_DIRECT	GO:0007584~response to nutrient	2	1.86916	0.0598103	DCS1, DCS2	86	4	5557	32.3081	1	0.940793	55.6565
GOTERM_BP_DIRECT	GO:0090342~regulation of cell aging	2	1.86916	0.0598103	DCS1, DCS2	86	4	5557	32.3081	1	0.940793	55.6565
GOTERM_BP_DIRECT	GO:0007050~cell cycle arrest	2	1.86916	0.0598103	FUS3, HUG1	86	4	5557	32.3081	1	0.940793	55.6565
GOTERM_BP_DIRECT	GO:0006099~tricarboxylic acid cycle	3	2.80374	0.0808182	CIT3, DAL7, SDH1	86	31	5557	6.25319	1	0.963508	67.0826
Category	Term	Count	%	PValue	Genes	List Total	Pop Hits	Pop Total	Fold Enrichment	Bonferroni	Benjamini	FDR
GOTERM_CC_DIRECT	GO:0005886~plasma membrane	16	14.9533	0.0101108	PUT4, ENA5, MFA2, FUR4, DAL5, PLB1, PHM7, SAM3, GIC2, HSP12, TPO2, KIN82, SEG2, ATO2, YNL194C, YAP1801	96	482	5861	2.02663	0.528581	0.528581	10.0904
GOTERM_CC_DIRECT	GO:0005737~cytoplasm	49	45.7944	0.0231719	GPG1, GSP2, YBR085C-A, ADR1, REE1, UBI4, HSP12, ATG8, EDC2, YER079W, HBN1, VHR1, YDR170W-A, SOL4, NTH1, GLC3, DCS1, DCS2, IGD1, YMR196W, KIN82, PRM15, SRL3, BAT2, HUG1, THI4, YKL151C, YLR035C-A, SDS24, HSP33, YIL108W, GIC2, IRC15, SNO1, GOR1, ACH1, YNL194C, SRD1, URA10, TMT1, RNP1, TFS1, DAL7, HSP42, YAP1801, YJR149W, FUS3, YDR391C, RCN2	96	2344	5861	1.27626	0.823583	0.579979	21.7599
GOTERM_CC_DIRECT	GO:0031966~mitochondrial membrane	4	3.73832	0.0787108	FMP33, MPC3, SDH1, VPS73	96	62	5861	3.93884	0.997681	0.867637	57.6021
Category	Term	Count	%	PValue	Genes	List Total	Pop Hits	Pop Total	Fold Enrichment	Bonferroni	Benjamini	FDR
GOTERM_MF_DIRECT	GO:0003824~catalytic activity	14	13.0841	0.00488212	ALT1, YLR035C-A, AMS1, NTH1, DAL7, GLC3, DCS1, DCS2, YMR196W, ACH1, QCR2, BIO2, YJR149W, BAT2	82	353	4885	2.36268	0.581528	0.581528	5.83958
GOTERM_MF_DIRECT	GO:0016491~oxidoreductase activity	11	10.2804	0.0215072	AAD10, THI4, IRC15, NDE2, GOR1, HBN1, YJR149W, AIM17, PRX1, SDH1, GDH3	82	292	4885	2.24419	0.979143	0.855579	23.456
GOTERM_MF_DIRECT	GO:0000340~RNA 7-methylguanosine cap binding	2	1.86916	0.0328911	DCS1, DCS2	82	2	4885	59.5732	0.997402	0.862531	33.7132
GOTERM_MF_DIRECT	GO:0050072~m7G(5')pppN diphosphatase activity	2	1.86916	0.0647134	DCS1, DCS2	82	4	4885	29.7866	0.999993	0.949062	56.0681
Category	Term	Count	%	PValue	Genes	List Total	Pop Hits	Pop Total	Fold Enrichment	Bonferroni	Benjamini	FDR
KEGG_PATHWAY	sce00500:Starch and sucrose metabolism	4	3.73832	0.0149581	PRM15, NTH1, GSC2, GLC3	30	40	2184	7.28	0.444438	0.444438	12.8079
KEGG_PATHWAY	sce01200:Carbon metabolism	6	5.60748	0.0153975	IRC15, ALT1, CIT3, DAL7, SDH1, SOL4	30	114	2184	3.83158	0.454021	0.261096	13.1609
KEGG_PATHWAY	sce01100:Metabolic pathways	16	14.9533	0.0164868	THI4, ALT1, NTH1, DAL7, GLC3, GDH3, IRC15, PRM15, CIT3, QCR2, MCT1, BIO2, SDH1, BAT2, URA10, SOL4	30	682	2184	1.70792	0.47709	0.194357	14.0307
KEGG_PATHWAY	sce01110:Biosynthesis of secondary metabolites	9	8.41121	0.0332925	IRC15, PRM15, CIT3, DAL7, GLC3, SDH1, SRT1, BAT2, SOL4	30	295	2184	2.22102	0.733002	0.281169	26.5022
KEGG_PATHWAY	sce00630:Glyoxylate and dicarboxylate metabolism	3	2.80374	0.0454477	IRC15, CIT3, DAL7	30	26	2184	8.4	0.836999	0.304274	34.4912
KEGG_PATHWAY	sce00020:Citrate cycle (TCA cycle)	3	2.80374	0.0660616	IRC15, CIT3, SDH1	30	32	2184	6.825	0.930432	0.358689	46.2875
KEGG_PATHWAY	sce01210:2-Oxocarboxylic acid metabolism	3	2.80374	0.0773468	ALT1, CIT3, BAT2	30	35	2184	6.24	0.956699	0.361421	51.9092
KEGG_PATHWAY	sce00910:Nitrogen metabolism	2	1.86916	0.089445	YJR149W, GDH3	30	7	2184	20.8	0.974121	0.366688	57.3487
KEGG_PATHWAY	sce00620:Pyruvate metabolism	3	2.80374	0.0932669	IRC15, ACH1, DAL7	30	39	2184	5.6	0.978037	0.345749	58.9493

## Sheet: Supplementart_TableS7
41 Genes up with DOX, down with Im
Category	Term	Count	%	PValue	Genes	List Total	Pop Hits	Pop Total	Fold Enrichment	Bonferroni	Benjamini	FDR
GOTERM_BP_DIRECT	GO:0030476~ascospore wall assembly	5	12.1951	6.38473e-05	AMA1, SPS1, GAS2, SPS22, LDS1	26	50	5557	21.3731	0.00496786	0.00496786	0.0675157
GOTERM_BP_DIRECT	GO:0030435~sporulation resulting in formation of a cellular spore	4	9.7561	0.0132744	SPS1, SPS22, LDS1, SMA1	26	112	5557	7.63324	0.647369	0.406173	13.1818
GOTERM_BP_DIRECT	GO:0031505~fungal-type cell wall organization	4	9.7561	0.024001	TIR4, TIR1, SPS22, HPF1	26	140	5557	6.10659	0.849669	0.46828	22.6612
GOTERM_BP_DIRECT	GO:0032120~ascospore-type prospore membrane assembly	2	4.87805	0.0654781	SPS1, SMA1	26	15	5557	28.4974	0.994919	0.73301	51.1459
GOTERM_BP_DIRECT	GO:0071555~cell wall organization	3	7.31707	0.0660403	TIR4, GAS2, HPF1	26	94	5557	6.82119	0.995152	0.655556	51.4559
GOTERM_BP_DIRECT	GO:0034220~ion transmembrane transport	2	4.87805	0.0946068	YRO2, MCH2	26	22	5557	19.4301	0.99957	0.725284	65.0512
Category	Term	Count	%	PValue	Genes	List Total	Pop Hits	Pop Total	Fold Enrichment	Bonferroni	Benjamini	FDR
GOTERM_CC_DIRECT	GO:0031225~anchored component of membrane	8	19.5122	6.30306e-08	TIR4, TIR1, SPR2, ANS1, YLR042C, GAS2, SPS22, HPF1	35	65	5861	20.6101	2.64728e-06	2.64728e-06	5.83347e-05
GOTERM_CC_DIRECT	GO:0016020~membrane	26	63.4146	1.49734e-07	SPR28, SPR2, SPG1, YLR042C, YPR159C-A, COS12, FRE7, FAR1, YMR182W-A, ANS1, HXT9, LDS1, SPS22, YLR342W-A, ERV2, TIR4, TIR1, YRO2, PTR2, GAS2, HPF1, YAL065C, PRM3, THI73, MCH2, YLR297W	35	1738	5861	2.50511	6.28883e-06	3.14442e-06	0.000138579
GOTERM_CC_DIRECT	GO:0000324~fungal-type vacuole	11	26.8293	2.83592e-06	TIR4, TIR1, SPR2, HXT9, ANS1, YLR042C, PTR2, GAS2, COS12, YLR297W, ERV2	35	284	5861	6.48602	0.000119102	3.97022e-05	0.00262461
GOTERM_CC_DIRECT	GO:0005618~cell wall	6	14.6341	3.88432e-05	TIR4, TIR1, SPR2, ANS1, YLR042C, HPF1	35	68	5861	14.7756	0.00163012	0.000407778	0.0359436
GOTERM_CC_DIRECT	GO:0009277~fungal-type cell wall	7	17.0732	4.09295e-05	TIR4, TIR1, SPR2, YLR042C, GAS2, SPS22, HPF1	35	114	5861	10.2825	0.0017176	0.000343756	0.0378738
GOTERM_CC_DIRECT	GO:0016021~integral component of membrane	19	46.3415	0.000109609	YRO2, SPG1, PTR2, YPR159C-A, COS12, GAS2, PRM7, FRE7, YAL065C, PRM3, THI73, FAT3, YMR182W-A, HXT9, MCH2, LDS1, YLR342W-A, YLR297W, ERV2	35	1326	5861	2.39946	0.00459327	0.000767014	0.101397
GOTERM_CC_DIRECT	GO:0071944~cell periphery	8	19.5122	0.000783834	TIR4, TIR1, FAT3, THI73, HXT9, YLR042C, PTR2, HPF1	35	272	5861	4.92521	0.0323975	0.0046938	0.723094
GOTERM_CC_DIRECT	GO:0005886~plasma membrane	10	24.3902	0.00129661	FRE7, SRO77, FAT3, THI73, YRO2, HXT9, ANS1, PTR2, GAS2, SPS22	35	482	5861	3.47421	0.0530348	0.00678848	1.19361
GOTERM_CC_DIRECT	GO:0005576~extracellular region	5	12.1951	0.00353044	TIR4, TIR1, SPR2, YLR042C, HPF1	35	110	5861	7.61169	0.138035	0.0163691	3.22021
GOTERM_CC_DIRECT	GO:0005628~prospore membrane	4	9.7561	0.00809797	SPR28, SPS1, LDS1, SMA1	35	72	5861	9.30317	0.289296	0.0335734	7.249
GOTERM_CC_DIRECT	GO:0005619~ascospore wall	2	4.87805	0.0674954	SPR28, LDS1	35	12	5861	27.9095	0.94687	0.234188	47.6254
Category	Term	Count	%	PValue	Genes	List Total	Pop Hits	Pop Total	Fold Enrichment	Bonferroni	Benjamini	FDR
GOTERM_MF_DIRECT	GO:0005215~transporter activity	4	9.7561	0.00521663	THI73, HXT9, MCH2, PTR2	22	84	4885	10.5736	0.249987	0.249987	5.01433
GOTERM_MF_DIRECT	GO:0005199~structural constituent of cell wall	3	7.31707	0.0155926	TIR4, TIR1, ANS1	22	45	4885	14.803	0.578675	0.350904	14.322
Category	Term	Count	%	PValue	Genes	List Total	Pop Hits	Pop Total	Fold Enrichment	Bonferroni	Benjamini	FDR
KEGG_PATHWAY	sce04113:Meiosis - yeast	3	7.31707	0.0183509	AMA1, SPS1, HXT9	5	126	2184	10.4	0.0884481	0.0884481	7.73917

## Sheet: Supplementart_TableS8
7 Genes down with DOX, up with Im
No BP
Category	Term	Count	%	PValue	Genes	List Total	Pop Hits	Pop Total	Fold Enrichment	Bonferroni	Benjamini	FDR
GOTERM_CC_DIRECT	GO:0016021~integral component of membrane	4	57.1429	0.0384074	PHO8, YJL133C-A, MEP1, RTC2	5	1326	5861	3.53605	0.444266	0.444266	23.837
GOTERM_CC_DIRECT	GO:0016020~membrane	4	57.1429	0.0810349	PHO8, YJL133C-A, MEP1, RTC2	5	1738	5861	2.69781	0.718496	0.46943	44.431
No MF
No KEGG
